# Supplementary material
Source: PubMed Central journal article supplement (PMC5671915)
Supplement: NIHMS881090-supplement.pdf [file NIHMS881090-supplement.pdf]

## Cocaine-induced Chromatin Modifications Associate With Increased Expression and 3-Dimensional Looping of *Auts2*

### *Supplementary Information*

#### **Supplementary Methods**

##### Animals

Eight week old male Sprague-Dawley rats (200-300 g) and 7- to 12-week-old C57BL/6J male mice (20–30 g) were purchased from the Jackson Laboratory, Bar Harbor, Maine. 2- to 3-month-old *Drd1* (D1)-tomato and *Drd2* (D2)-green fluorescent protein (GFP) bacterial artificial chromosome (BAC) transgenic mice of both sexes as well as male D1-Cre and D2-Cre BAC transgenic mice (25–32 g, C57BL/6J background; Gene Expression Nervous System Atlas [GENSAT] Project; [www.gensat.org](http://www.gensat.org)) were obtained from N. Heintz (Rockefeller University) and C. Gerfen (National Institute of Mental Health). Despite the fact that both lines are fully backcrossed to C57BL/6J, small differences have been seen in several baseline behaviors, such as cocaine conditioned place preference as is evidenced in Fig. 5.

We used rats and mice in this study to take advantage of strengths unique to each species. Rats were used for procedures that require a relatively large amount of tissue (e.g., 3C and 4C), which also enabled separate analysis of NAc core and shell subregions. Such separate subregion analyses are not feasible in mouse based on our extensive experience. Conversely, transgenic mouse lines enable the separate biochemical and behavioral analysis of cell type-specific regulation, which is not feasible in rat.

Mice had ad libitum access to food and were group-housed (2-5 mice per cage) at 22–25°C on a 12-hour light/dark cycle. They were habituated for at least 1 week before experimentation and assigned randomly to experimental groups. All behavioral experiments except for self-administration were performed during the light cycle. Behavioral experiments were centered around midday. Experiments were carried out by experimenters blind to animal treatment conditions and were conducted in accordance with the guidelines

of the Institutional Animal Care and Use Committees at Mount Sinai. Female mice were balanced by estrous cycle during experiments.

#### Chromosome conformation capture (3C) and circularized chromosome-conformation capture (4C)

Protocols were modified from (1). An overview of the protocol is shown in Fig. S14. Approximately 50 mg wet weight tissue—12-gauge punches from 5 males rats (4 punches of each NAc subregion/rat) or 14-gauge punches from 8 male mice (2 punches of whole NAc/mouse)—were Dounce-homogenized in lysis buffer (10 mM Tris-HCl, pH 8.0; 10 mM NaCl, 0.2% NP-40, protease inhibitor cocktail (Sigma, #P2714-1BTL)) and then cross-linked for 10 min at room temperature in 1% formaldehyde. Crosslinking was stopped by adding glycine to a final concentration of 0.125 mM, lysed and centrifuged for 5 min at 240 x g. The pellet was washed 4 times in the 1X New England Biolabs (NEB)-buffer applicable for the restriction enzyme of interest by centrifugation for 5 min at 2,650 x g and removing the supernatant. 0.1% SDS was added and samples were incubated at 65°C for 10 min to make chromatin accessible for digestion. SDS was quenched by adding Triton X-100 to a final concentration of 1%. Samples were digested with NcoI (for 4C, 6 bp-cutter) or Nla3 (for 3C, 4 bp-cutter) (both NEB, #R0193L and #R0125L, respectively) at 37°C overnight. The digestion enzyme was inactivated by adding SDS to a final concentration of 1.4% for 30 min at 65°C. Next, ligation in a large volume (7.55 ml) was performed at 16°C for 5 h after ligation buffer was added to the samples (500 mM Tris-HCl, pH 7.5, 100 mM MgCl<sub>2</sub>, 100 mM DTT dithiothreitol, 0.9% Triton TX-100, 0.1 mg/ml bovine serum albumin (Sigma, # B42087), 1 mM ATP (Sigma, #A1852-1VL)). T4 DNA ligase (5 U/μl, Life Technologies, #15224-041) was added to 3 samples, while the 4th sample was used as a no ligase control (final ligase concentration: 6.6 U/ml). After ligation, samples were reverse cross-linked at 65°C overnight and again for 2 h with proteinase K (final concentration: 0.066 mg/ml, Life Technologies, # AM2546). DNA was extracted with 1:1 volume of phenol (pH 8.0, Fisher), and phenol-chloroform (1:1) (pH 8, Fisher). DNA was precipitated using 1/10 the volume of 3M sodium acetate (pH 5.4) and 2.5x the volume of ice-cold ethanol overnight at -80°C. The samples were centrifuged at 3,220 x g for 45 min at 4°C. The pellet was re-suspended in TE-buffer (pH 8.0) and transferred to a 2.0 ml tube. To increase the purity of the DNA, another cleanup with phenol and phenol-chloroform was conducted. Ethanol precipitation was performed for at least 1 h at -80°C and DNA was

pelleted by centrifugation at 18,000 x g at 4°C. The pellet was washed five times with 1 ml of 70% ethanol and re-dissolved in 50 µl of TE, pH 8.0 and incubated for 30 min at 37°C after adding 1 µl of RNase A (20mg/ml, Life technologies, #12091-021). An additional DNA-purification was conducted by using the DNeasy Blood & Tissue-kit (Qiagen, #69504).

For 4C, the samples were re-suspended in 200 µl NEB-buffer and the entire 3C-procedure was repeated, using the 4 bp-cutter Dpn2 as second restriction enzyme (NEB, #R0543L). 4C-primers were designed for *Auts2* in an intronic, CpG-rich, promoter-proximal region. This region fulfilled the criteria of ideal length of the 4C-fragment (291 bp). The primers were designed with the UCSC genome browser (Rat: RN6; mouse: mm10), NCBI primer Blast, and IDT tools. 4C libraries were amplified by outwards-PCR with the 4C primers and purified with a Minelute PCR Purification kit (Qiagen, #28004) (PCR conditions: 2 min at 94°C; 30 cycles of: 15 sec at 94°C; 1 min at 55°C; 3 min at 68°C; 1x: 7 min at 68°C; hold at 4°C). Quality and amount of libraries and PCR products were assessed with an Agilent High Sensitivity DNA kit (Agilent Technologies, #5067-4626). For next-generation sequencing, the samples were processed with a TruSeq Nano DNA Library Prep Kit (Illumina, #FC-121-4001). The library was submitted for next-generation paired-end sequencing to the Mount Sinai sequencing core.

The 4C-sequencing data were first checked for quality using the various metrics generated by FastQC (v0.11.2) (2), which indicated a substantial presence of primer sequences in the reads. Cutadapt (v1.8.1) (3) was thus used to trim off the presence of either of the two primers used, and the trimmed reads were then aligned to the rat RN6 genome using default settings of Bowtie (v2.2.0) (4). The Bioconductor package FourCSeq (v1.2.0) (5) was used to generate the list of valid 4C fragments on the rat genome, after which a custom-written R script was used to count the reads aligning precisely at the edges of the fragments. Differential analysis of fragment read-counts between cocaine treatment and saline samples were then performed using the DESeq2 Bioconductor package (v1.6.3) (6).

For 3C, physical looping interactions were quantified by PCR. Primers were designed less than 120 bp from the *Nla3* restriction site, using the UCSD genome browser, NCBI primer Blast, and IDT tools. Mouse

genome regions of interest were determined by using the USCS genome browser BLAT-tool to identify regions that are homologous to Rat 4C-areas. For PCR, GoTag Green Master Mix (Promega, #M7122), Primers A and B (0.5  $\mu$ M each), 5% dimethyl sulfoxide (NEB, #12611), as well as a dilution series of library template, starting at 4  $\mu$ l. PCR conditions were: 5 min at 95°C; 40 cycles of: 30 sec at 95°C; 30 sec at 58-61°C; 30 sec at 72°C; 1 x 30 sec at 95°C; 30 sec at 60°C and 8 min at 72°C. The melting temperature was optimized for each primer pair separately. Primer specificity was confirmed with Sanger sequencing. The PCR products were resolved on a 2% agarose gel. Interaction levels between two primers were measured semi-quantitatively using band intensities with ImageJ after subtracting the background. Primers are listed in Table S5.

#### Cocaine administration

Cocaine was given by repeated injections or by self-administration. For the former, male and female mice received daily intraperitoneal (I.P.) injections of cocaine hydrochloride (Sigma, #C5776) for 7 consecutive days at 20 mg/kg body weight. Mice were analyzed 24 h after the final injection. Control mice received saline injections. Bilateral 14-gauge NAc punches were taken from each animal. Please note that cell type-specific analyses are not readily feasible in mouse self-administration models due to the relatively low throughput of this behavioral procedure and the requirement for relatively large amounts of tissue for cell isolation.

#### Cocaine self-administration

Male rats were anesthetized with ketamine (100 mg/kg) and xylazine (10 mg/kg), implanted with chronic indwelling jugular catheters, and trained for i.v. self-administration as previously described (7; 8). The catheter tubing was passed subcutaneously from the back to the jugular vein and 1.2 cm of tubing was inserted into the vein and secured with silk suture. Following surgery, animals were singly housed, and allowed to recover for 48-72 h. Each animal was maintained on a reversed light-dark cycle (7:00 am lights off; 7:00 pm lights on) and all self-administration procedures occurred during the active/dark cycle. Sessions were 6 h in length and animals self-administered cocaine (0.8 mg/kg/inj over 5 sec) on a fixed-ratio 1 schedule of administration. At the beginning of each session a house light was illuminated

signifying the availability of drug. Concurrent with the start of each injection, the lever retracted, the house light was turned off, and a stimulus light was activated for 20 sec to signal a time-out period. Under these conditions, animals acquired a stable pattern of intake within 1 to 5 days. For self-administering animals, acquisition (day 1) was counted when the animal reached 70% responding on the active lever and 20 or more responses. Following acquisition, the animals were given unlimited access to a cocaine-paired lever for six hours per day for a period of 10 days. An inactive lever was present and responding was recorded, but had no programmed consequence. Control animals underwent the same experimental procedures but had access to a saline-paired active lever.

#### Human brain tissue

NAc samples from humans addicted to cocaine or matched controls, or a separate cohort of depressed patients and their matched controls, were acquired from the brain bank at McGill University. The cocaine cohort was composed of 30 male subjects, ranging in age between 15 and 53 years, the depression cohort consisted of 19 male subjects between 25 and 81 years. In all subjects, the death was sudden without protracted medical illness or a prolonged agonal state. Subjects met the Structured Clinical Interview for DSM-IV (Diagnostic and Statistical Manual of Mental Disorders-IV) criteria for cocaine dependence or depression. Groups were matched for mean subject age, postmortem delay, and pH. For all subjects, psychological autopsies were performed as described previously (9). A sufficient number of female subjects was not available for study of possible sex differences in humans.

#### Quantitative PCR

Brain samples were homogenized in Trizol (Invitrogen) and processed according to the manufacturer's instructions. RNA was purified with an RNeasy Micro-kit (Qiagen, #74004). RNA was then reverse transcribed using a Bio-Rad iScript Kit (Biorad, #170-8890). cDNA was quantified by quantitative PCR (qPCR) using PerfeCTa SYBR Green Fast mix (Quanta Bioscience, #95073-012). Each reaction was run in triplicate and analyzed following the  $\Delta\Delta C_t$  method using up to 3 of the following control genes as normalization controls: glyceraldehyde-3-phosphate dehydrogenase (*Gapdh*), actin (*Actb*), 18S rRNA

(*RNA18S5*), and  $\beta$ 2-microglobulin (B2m). Primers were designed using the NCBI Primer design tool and are shown in Table S5.

#### FACS isolation of MSNs from D1-Tomato and D2-GFP mice

NAC punches from D1-Tomato and D2-GFP mice of both sexes were collected in ice-cold digestion buffer (88.5% Hibernate A (Brainbits, #HA-CaMg500), 5% w/v D-(+)-Trehalose dihydrate (Sigma, #T9531-25G), 0.05 mM APV (Sigma, #A5282), 0.025 U/ml RNA-se free DNase I (NEB, #M0303L)) and digested in papain solution (Worthington Biochemical corporation, #LS3119 in FACS-buffer, see below) at 37°C on a rotor (225 rpm) for 45 min. Tissue was incubated for 5 min in 2 ml FACS-buffer (83% Hibernate A, 0.084 mM APV, 5.38% Ovomucoid Albumin Inhibitor solution (see below), 16.7 U/ml RNase-free DNase, 8% trehalose). Next, the tissue was titrated to allow for cells to gently disperse. The cell suspension was gently passed through a 70  $\mu$ m filter mesh (BD, #352350) and kept on ice. To select for intact, dissociated cells, the samples were passed over a gradient: 32 ml of FACS buffer were added to one vial of Ovomucoid Albumin Inhibitor (Worthington Biochemical Corporation, #LK003182) and mixed well. 2 ml of gradient were added to a 15 ml tube and the cell suspension was slowly transferred on top of the gradient before being spun at 100 x g for 6 min at 4°C. After removing the gradient solution, 1 ml of FACS buffer was added to the pellet and centrifuged twice at 200 x g for 6 min at 4°C. Cells were re-suspended in 400  $\mu$ l of FACS buffer and passed through a 40  $\mu$ m filter mesh tube (Fisher, #08-771-23). 2.5  $\mu$ l of DAPI (200 mg/ $\mu$ l, Thermo Fisher Scientific, # D3571) were added to the cell suspension. Cells were sorted on a BD FACS Aria II and collected into Trizol LS-reagent (Ambion, #10296-028) and RNA was extracted using the Direct-zol RNA miniprep kit with DNase treatment (Zymo, #R2050), following manufacturer's recommendations. RNA quality was assessed with an Agilent RNA 6000 PICO kit (Agilent Technologies, #5067-1513).

#### Quantitative chromatin immunoprecipitation (qChIP)

qChIP was performed as previously described (10). DNA was purified with a PCR Purification Kit (Qiagen, #28104). Concentration and shearing efficiency were assessed by use of the dsDNA HS Assay and Agilent High-Sensitivity DNA kits (Thermo Fisher Scientific, #Q32851; Agilent Technologies, #5067-4626).

Amounts of chromatin and antibodies were optimized prior to the experiments. ChIP grade antibodies to H3K4me3 (Abcam, #ab8580, 5 µg per sample), H3K27ac (Abcam, # ab4729, 5 µg per sample) or the ChIPAb+ CTCF - ChIP Validated Antibody (5 µg per sample, EMD Millipore, #17-10044) were used per ChIP reaction. Controls were the PP64 Rabbit IgG (EMD Millipore, #PP64) and the mouse IgG provided in the CTCF-ChIP kit (EMD Millipore, #17-10044). Data are represented as ChIP/input. Primers are shown in Table S5.

### Bisulfite sequencing

14 gauge NAc punches from 3 male mice were pooled and DNA was purified with a QIAamp DNA Mini-kit (Qiagen, #51304) followed by a Qiaquick PCR Purification kit (Qiagen, #28104). Bisulfite conversion was conducted with the EZ DNA methylation kit (Zymo, #D5001), starting with a DNA amount of 500 ng per sample. Primers were designed with the Zymo Research Primer Seeker-tool and validated by Sanger-sequencing. For PCR, Platinum™ Taq Green Hot Start DNA Polymerase and dNTP Mix (Thermo Fisher Scientific, #11966-018 and 18427-013) were used according to manufacturers' instructions. PCR conditions were: 2 min at 94°C; 40 cycles of: 30 sec at 94°C, 30 sec at 55-62°C, 1 min at 72°C; hold at 4°C. Products were purified with the Qiaquick PCR Purification kit. Quality and concentration of samples were assessed with dsDNA HS Assay and Agilent High-Sensitivity DNA kits (Thermo Fisher Scientific, #Q32851; Agilent Technologies, #5067-4626). Libraries were prepared with a TruSeq Nano DNA Library Prep Kit (Illumina, #FC-121-4003) according to manufacturers' instructions. Libraries were pooled and sequenced on an Illumina MiSeq sequencer, using a 600 cycle, V3-chemistry sequencing kit (Illumina, #MS-102-3003). Approximately 400,000 molecules were sequenced per library. Sequencing data were then analyzed using Bismark software (Reference: PMID: [21493656](https://pubmed.ncbi.nlm.nih.gov/21493656/), <http://www.bioinformatics.babraham.ac.uk/projects/bismark>) to determine the level of methylation at individual CpG dinucleotide resolution. Briefly, sequences were aligned to both bisulfite converted and reference genomes using the Bowtie2 aligner, and the methylation status was determined for each individual CpG in each aligned molecule. For each CpG, we then calculated the level of methylation (fraction of molecules methylated at that CpG). Primers are shown in Table S5.

### CRISPR epigenome-editing

A vector coding the dCas9-DNMT3ACD-DNMT3LCD-3xFLAG fusion gene was constructed by Gibson assembly. The human codon optimized nuclease-null Cas9 from *S. pyogenes* coding plasmid was a gift from George Church, Harvard University (Addgene, #48674). The sequence of the catalytic domain of *Dnmt3a* fused with the C-terminal domain of *Dnmt3L* was amplified from a published plasmid (11). The 3xFLAG tag was assembled by annealing the complementary partially overlapping oligonucleotides and using extension PCR. As a control construct, a FLAG-dCas9 was synthesized and cloned into an entry vector in conjunction with GENEWIZ. It was then cloned into a hSyn-GW-IRES-mCherry destination vector and validated by Sanger sequencing.

For designing guide RNAs, we followed the protocol from the Church laboratory provided as online source by Addgene (<https://www.addgene.org/crispr/church/>). Guide RNA sequences were de-novo synthesized using G-blocks from IDT. They were then cloned into a TOPO-vector using the Zero Blunt® TOPO® PCR Cloning Kit, with One Shot® TOP10 Chemically Competent *E. coli* cells (Thermo Fisher Scientific, #K280020) according to manufacturers' instructions. Constructs were amplified and harvested with a QIAGEN Plasmid Midi Kit (Qiagen, #12143). The sequence of guide RNAs was confirmed by Sanger sequencing. A non-targeting guide RNA was utilized as a control (12). The sequence GCG AGG TAT TCG GCT CCG CG was de-novo synthesized and cloned as described above. Guide RNA sequences are shown in Table S5.

### miRNA vectors

miR constructs were designed with the Thermo Fisher Scientific BLOCK-iT™ RNAi Designer tool. The sequences were: *Auts2*-miR top: TGC TGT AAA GTG GAA GGT CGT GCC AGG TTT TGG CCA CTG ACT GAC CTG GCA CGC TTC CAC TTT A, *Auts2*-miR bottom: CCT GTA AAG TGG AAG CGT GCC AGG TCA GTC AGT GGC CAA AAC CTG GCA CGA CCT TCC ACT TTA C. The constructs were purchased from IDT and cloned into a pcDNA 6.2 GW/miR vector with the BLOCK-iT™ Pol II miR RNAi Expression Vector Kit (Thermo Fisher Scientific, #K493500) according to the manufacturers' instructions. The provided *LacZ* construct served as a control. They were then transformed into One Shot TOP10



chemically competent *E. coli* (Thermo Fisher Scientific, #C404003C404003) according to the manufacturers' instructions, amplified, and harvested with a QIAGEN Plasmid Midi Kit (Qiagen, #12143). The correctness of cloning was validated by Sanger sequencing.

#### Transfection and RNA purification from Neuro2A cells

Neuro2A cells (ATCC, #CCL131) were transfected with lipofectamine 2000 transfection reagent (Thermo Fisher Scientific, #11668-019) as described (13). Cells were rinsed with PBS, lysed and harvested 24 h later using the RNeasy Minikit (Qiagen, #74104) and Qias shredder columns (Qiagen, #79656) according to manufacturers' instructions. RNA was converted to cDNA and examined by qPCR as described above.

#### Herpes simplex virus (HSV) vectors

Overexpression vectors for *Auts2* and *Caln1* were purchased from Origene (# MR225787 and MR202484). They were cloned into a pENTR1A Dual Selection Vector (Life Technologies, #A10462). Products were purified from a 1% agarose gel with the Qiaquick Gel extraction kit (Qiagen, #28706), and the PCR purify kit (Qiagen, #28104). Ligation into the open pENTRA vectors was done with T4 ligase (1 U/ $\mu$ l, Life Technologies, #15224-041) at a vector/insert ratio of 1:3 (total DNA < 100 ng; PCR conditions: 15 h at 14°C; hold at 4°C). Constructs were transformed into One Shot TOP10 chemically competent *E. coli* (Thermo Fisher Scientific, #C404003C404003), amplified and harvested with a QIAprep spin miniprep kit (Qiagen, #27104), and validated by Sanger sequencing. The insert was then subcloned into a p1005-LS1L-vector by using the Gateway® LR Clonase® Enzyme mix (Thermo Fisher Scientific, #11791019) according to manufacturers' instructions. Correct clones were amplified, harvested with a Qiagen Plasmid Midi kit (Qiagen, #12143), and sent for HSV packaging to the viral core facility at the McGovern Institute for Brain Research at Massachusetts Institute of Technology. Proper expression of the viruses was confirmed under a fluorescent microscope as well as by qPCR from NAc punches of stereotaxically injected Cre driver mice vs. a GFP-control vector.

### Conditioned place preference

Conditioned place preference was carried out in a 3-chambered box containing 2 end-chambers and a small middle chamber as described previously using Med Associates software (14). Prior to the experiment, mice were allowed to habituate to the test environment for 1 h.

### Data analysis

Data were analyzed with Prism 6.0 (GraphPad Software, San Diego, California). Differences between 2 groups were assessed using Student's t-tests. One-way ANOVAs were used when 3 or more ungrouped comparisons were made, while 2-way ANOVAs were used in instances in which 4 groups were analyzed across 2 separate parameters. Following 2-way ANOVAs, Bonferroni post hoc testing was used to assess statistical differences for all specific comparisons, while Tukey post-hoc tests were used for One-way ANOVAs. For the analysis of changes in bisulfite sequencing over CG positions, One-way ANOVA was performed for each CG individually as baseline methylation varied considerably between CGs. Furthermore, methylation at various CGs may not be independent measures. All summary data are expressed as means  $\pm$  SD. Significance was set at  $p < 0.05$ . See figure legends for statistical details of individual experiments, including statistical tests used, t, P, and F values, and number of subjects or samples tested.

**Supplementary Tables**

Table S1. Genes with most cocaine-induced chromatin modifications in NAc

| <b>Gene</b>    | <b>No. modifications</b> |
|----------------|--------------------------|
| <i>Celf2</i>   | 50                       |
| <i>Csmd1</i>   | 45                       |
| <i>Myt1l</i>   | 42                       |
| <i>Dlgap2</i>  | 40                       |
| <i>MacroD2</i> | 39                       |
| <i>Caln1</i>   | 35                       |
| <i>Auts2</i>   | 34                       |
| <i>Anks1b</i>  | 32                       |
| <i>Kirrel3</i> | 32                       |

Based on analysis of data in Feng *et al.* (14).

Table S2. Cocaine-induced changes in *Auts2*-DNA interacting fragments (NAc shell)

| NAc shell             | chr   | log2 FC | pvalue | padj  | location   | gene |
|-----------------------|-------|---------|--------|-------|------------|------|
| 12:26099150-26111925  | chr12 | 11.61   | 0.000  | 0.000 | intergenic |      |
| 12:27213674-27214837  | chr12 | 11.82   | 0.000  | 0.000 | intergenic |      |
| 12:27284010-27294234  | chr12 | -9.33   | 0.000  | 0.000 | intergenic |      |
| 12:26156256-26157848  | chr12 | 10.77   | 0.000  | 0.000 | intergenic |      |
| 12:26141041-26143417  | chr12 | 11.82   | 0.000  | 0.000 | intergenic |      |
| 12:27582093-27583052  | chr12 | -9.37   | 0.000  | 0.000 | intergenic |      |
| 12:26625862-26627898  | chr12 | 10.27   | 0.000  | 0.000 | intergenic |      |
| 12:26353729-26361053  | chr12 | -9.70   | 0.000  | 0.000 | intergenic |      |
| 12:26541760-26542376  | chr12 | -9.22   | 0.000  | 0.000 | intergenic |      |
| 12:26588563-26591425  | chr12 | -9.27   | 0.000  | 0.000 | intergenic |      |
| 12:27119147-27123135  | chr12 | -7.50   | 0.000  | 0.000 | intergenic |      |
| 12:26126413-26130008  | chr12 | -8.36   | 0.000  | 0.000 | intergenic |      |
| 12:26164477-26167050  | chr12 | -8.52   | 0.000  | 0.000 | intergenic |      |
| 12:26939653-26940640  | chr12 | -8.60   | 0.000  | 0.000 | intergenic |      |
| 12:26778788-26779396  | chr12 | 10.73   | 0.000  | 0.001 | intergenic |      |
| 12:25752890-25754378  | chr12 | 9.20    | 0.000  | 0.001 | intergenic |      |
| 12:27447303-27452932  | chr12 | 6.53    | 0.000  | 0.002 | intergenic |      |
| 12:26617690-26617933  | chr12 | 9.68    | 0.000  | 0.002 | intergenic |      |
| 12:26721883-26722368  | chr12 | 8.37    | 0.000  | 0.003 | intergenic |      |
| 12:26149819-26156250  | chr12 | 8.50    | 0.001  | 0.009 | intergenic |      |
| 12:27135935-27140886  | chr12 | -6.89   | 0.001  | 0.009 | intergenic |      |
| 12:27114577-27118474  | chr12 | -7.89   | 0.002  | 0.012 | intergenic |      |
| 12:27242295-27243882  | chr12 | -4.85   | 0.004  | 0.024 | intergenic |      |
| 12:27234679-27237963  | chr12 | 3.93    | 0.006  | 0.037 | intergenic |      |
| 1:187351014-187352900 | chr1  | 6.17    | 0.007  | 0.044 | intergenic |      |

| NAC shell              | chr   | log2 FC | pvalue | padj  | location   | gene           |
|------------------------|-------|---------|--------|-------|------------|----------------|
| 12:27108002-27108982   | chr12 | -7.39   | 0.010  | 0.056 | intergenic |                |
| 12:29680069-29681962   | chr12 | -7.06   | 0.011  | 0.065 | Genebody   | <i>Caln1</i>   |
| 16:10456002-10457885   | chr16 | 6.81    | 0.013  | 0.072 | intergenic |                |
| 12:29129317-29131210   | chr12 | -6.87   | 0.017  | 0.083 | Genebody   | <i>Wbscr17</i> |
| 2:77391522-77392571    | chr2  | 5.42    | 0.017  | 0.083 | intergenic |                |
| 12:26283113-26288674   | chr12 | -6.83   | 0.017  | 0.083 | intergenic |                |
| 12:27194780-27195797   | chr12 | 4.32    | 0.020  | 0.088 | intergenic |                |
| 15:5910643-5917898     | chr15 | 5.49    | 0.020  | 0.088 | intergenic |                |
| 19:54300740-54302072   | chr19 | 6.62    | 0.020  | 0.088 | intergenic |                |
| 15:5923148-5923796     | chr15 | 6.52    | 0.020  | 0.088 | intergenic |                |
| 12:27140892-27147114   | chr12 | -5.26   | 0.021  | 0.089 | intergenic |                |
| 3:92145843-92156350    | chr3  | 6.44    | 0.022  | 0.089 | Genebody   | <i>Trim44</i>  |
| 7:110980774-110981634  | chr7  | 6.49    | 0.022  | 0.089 | intergenic |                |
| 12:25946321-25949354   | chr12 | -5.55   | 0.028  | 0.110 | intergenic |                |
| 9:97367591-97368093    | chr9  | 1.03    | 0.029  | 0.111 | intergenic |                |
| 13:74692155-74693558   | chr13 | 6.16    | 0.034  | 0.119 | intergenic |                |
| 8:122228129-122229181  | chr8  | 6.16    | 0.034  | 0.119 | Genebody   | <i>Ubp1</i>    |
| 12:27523986-27525798   | chr12 | -4.15   | 0.034  | 0.119 | Genebody   | <i>Auts2</i>   |
| 10:105080222-105086179 | chr10 | 6.06    | 0.036  | 0.125 | Genebody   | <i>Ten1</i>    |
| 12:27183781-27184286   | chr12 | 4.27    | 0.042  | 0.142 | Genebody   | <i>Auts2</i>   |
| 16:10450034-10452370   | chr16 | 4.78    | 0.048  | 0.158 | intergenic |                |

Table S3. Auts2-transcripts

| Transcript id      | Transcript name | chrom | start     | end       | log2FC  | p value | q value |
|--------------------|-----------------|-------|-----------|-----------|---------|---------|---------|
| ENSMUST00000061007 | Auts2-201       | chr5  | 131915306 | 133017693 | -0.4673 | 0.0001  | 0.0023  |
| ENSMUST00000071591 | Auts2-012       | chr5  | 132525600 | 133018668 | -0.5240 | 0.4751  | 1.1580  |
| ENSMUST00000100564 | Auts2-003       | chr5  | 132501849 | 133017902 | 0.0632  | 0.8320  | 1.1213  |
| ENSMUST00000159507 | Auts2-006       | chr5  | 131951198 | 132013840 | 0.7907  | 0.2898  | 1.0428  |
| ENSMUST00000160071 | Auts2-008       | chr5  | 131913205 | 132010267 | -0.0960 | 0.3574  | 1.1065  |
| ENSMUST00000160135 | Auts2-011       | chr5  | 131952440 | 132925230 | 0.2363  | 0.4573  | 1.1547  |
| ENSMUST00000161108 | Auts2-004       | chr5  | 132244281 | 133018274 | 0.3812  | 0.2640  | 1.0089  |
| ENSMUST00000161226 | Auts2-001       | chr5  | 131913205 | 133019214 | 0.1333  | 0.1470  | 0.7974  |
| ENSMUST00000161374 | Auts2-007       | chr5  | 131915168 | 132014557 | -0.0607 | 0.5644  | 1.1651  |
| ENSMUST00000161804 | Auts2-005       | chr5  | 131913658 | 132092475 | 0.0330  | 0.6776  | 1.1540  |
| ENSMUST00000162101 | Auts2-010       | chr5  | 131916427 | 131936019 | 0.0798  | 0.7390  | 1.1417  |
| ENSMUST00000162979 | Auts2-013       | chr5  | 131921294 | 131931732 | -0.4613 | 0.3906  | 1.1291  |

Table S4. Patient data

| <b>Group ID</b> | <b>Cause of Death</b> | <b>Age</b> | <b>Gender</b> | <b>Weight (g)</b> | <b>pH</b> | <b>PMD (h)</b> | <b>Comorbidity</b>     |
|-----------------|-----------------------|------------|---------------|-------------------|-----------|----------------|------------------------|
| control         | Accident              | 19         | male          | 1428              | 6.55      | 1.50           |                        |
| control         | Suicide               | 26         | male          | 1902              | 6.97      | 5.00           |                        |
| control         | Natural               | 47         | male          | 1412              | 6.49      | 3.50           |                        |
| control         | Natural               | 30         | male          | 1517              | 6.37      | 11.00          |                        |
| control         | Accident              | 28         | male          | 1565              | 6.32      | 2.25           |                        |
| control         | Natural               | 41         | male          | 1376              | 6.00      | 3.00           |                        |
| control         | Accident              | 32         | male          | 1516              | 6.67      | 4.00           |                        |
| control         | Natural               | 46         | male          | 1210              | 6.42      | 1.50           |                        |
| control         | Natural               | 27         | male          | 1595              | 6.55      | 3.00           |                        |
| control         | Suicide               | 25         | male          | 1600              | 6.73      | 11.25          |                        |
| control         | Accident              | 15         | male          | 1420              | 6.72      | 16.75          |                        |
| control         | Accident              | 42         | male          | 1470              | 6.75      | 2.50           |                        |
| control         | Natural               | 18         | male          | 1470              | 6.87      | 2.00           |                        |
| control         | Suicide               | 17         | male          | 1460              | 6.95      | 7.50           |                        |
| control         | Accident              | 20         | male          | 1533              | 6.30      | 12.00          |                        |
| Cocaine dep     | Accident              | 51         | male          | 1428              | 6.73      | 1.50           | Major Depression       |
| Cocaine dep     | Natural               | 39         | male          | 1140              | 6.86      | 27.50          | Depressive NOS         |
| Cocaine dep     | Suicide               | 36         | male          | 1548              | 6.54      | 12.00          | Bipolar Disorder       |
| Cocaine dep     | Suicide               | 45         | male          | 1430              | 6.57      | 2.75           | Major Depression       |
| Cocaine dep     | Suicide               | 35         | male          | 1425              | 6.81      | 3.50           |                        |
| Cocaine dep     | Suicide               | 26         | male          | 1480              | 6.67      | 13.50          | Major Depression       |
| Cocaine dep     | Suicide               | 24         | male          | 1460              | 6.89      | 2.50           |                        |
| Cocaine dep     | Suicide               | 48         | male          | 1460              | 6.56      | 1.75           | Major Depression       |
| Cocaine dep     | Suicide               | 33         | male          | 1580              | 6.75      | 9.00           |                        |
| Cocaine dep     | Suicide               | 43         | male          | 1445              | 6.78      | 5.25           | Psychotic Disorder NOS |
| Cocaine dep     | Accident              | 24         | male          | 1480              | 6.33      | 7.00           |                        |
| Cocaine dep     | Suicide               | 39         | male          | 1552              | 6.70      | 4.25           | Major Depression       |
| Cocaine dep     | Suicide               | 38         | male          | 1511.4            | 6.50      | 16.00          | Depressive NOS         |
| Cocaine dep     | Suicide               | 53         | male          | 1366.1            | 6.50      | 28.00          |                        |
| Cocaine dep     | Suicide               | 43         | male          | 1411.5            | 6.90      | 19.00          |                        |

|            | <b>Cause of Death</b> | <b>Age</b> | <b>Gender</b> | <b>Weight (g)</b> | <b>pH</b> | <b>PMD (h)</b> | <b>Comorbidity</b> |
|------------|-----------------------|------------|---------------|-------------------|-----------|----------------|--------------------|
| Control    | Suicide               | 31         | male          | 1745              | 6.27      | 32.5           |                    |
| Control    | Natural               | 47         | male          | 1412              | 6.49      | 12             |                    |
| Control    | Natural               | 30         | male          | 1517              | 6.37      | 30             |                    |
| Control    | Natural               | 41         | male          | 1376              | 6         | 24             |                    |
| Control    | Accident              | 32         | male          | 1516              | 6.67      | 29.5           |                    |
| Control    | Natural               | 46         | male          | 1210              | 6.42      | 19.5           |                    |
| Control    | Suicide               | 25         | male          | 1600              | 6.73      | 36             |                    |
| Control    | Suicide               | 46         | male          | 1600              | 6.83      | 59             |                    |
| Control    | Accident              | 42         | male          | 1470              | 6.75      | 63             |                    |
| Depression | Suicide               | 52         | male          | 1370.5            | 6.3       | 29             |                    |
| Depression | Suicide               | 53         | male          | 1507              | 6.64      | 14             |                    |
| Depression | Suicide               | 39         | male          | 1264              | 6.6       | 25.5           |                    |
| Depression | Suicide               | 49         | male          | 1280              | 6.57      | 32             |                    |
| Depression | Suicide               | 40         | male          | no info           | 6.96      | 22             |                    |
| Depression | Suicide               | 53         | male          | no info           | 6.91      | 33.5           |                    |
| Depression | Suicide               | 68         | male          | 1100              | 6.93      | 32             |                    |
| Depression | Suicide               | 51         | male          | 1200              | 6.74      | 54             |                    |
| Depression | Suicide               | 63         | male          | 1420              | 6.95      | 50             |                    |
| Depression | Suicide               | 49         | male          | 1432.8            | 6.7       | 2.5            |                    |



Table S5. Sequences of primers and guide-RNAs

| Name                    | Sequence                        |
|-------------------------|---------------------------------|
| <b>3C / 4C</b>          |                                 |
| 4C Rat Fvd              | CCC TTT CCT GTT CCC CCC A       |
| 4C Rat Rev              | TCT CCC GGT CTC GCT GTG         |
| Rat Auts2-Caln1 Fvd     | CCT CAG CCG AAG AGG ACA TC      |
| Rat Auts2-Caln1 Rev     | CTG TGC CGA TAA CCC TGG TG      |
| Rat Control Fvd         | AAG TGT CCG GAG AAA GGT GC      |
| Rat Control Rev         | CCA GCC CCT CAG CCT TTT T       |
| Mouse Auts2-Caln1 Fvd   | GAC TCT CTG CGC TTC CTC C       |
| Mouse Auts2-Caln1 Rev   | CTG CTC TCC TCC AAG GTT C       |
| Mouse Control Fvd       | CCA AGG TTG ATG CCT GGG AA      |
| Mouse Control Rev       | CTG CTCT GAC CCC ATT GTC C      |
| <b>qPCR</b>             |                                 |
| Actb Mouse Fvd          | TGT TAC CAA CTG GGA CGA CA      |
| Actb Mouse Rev          | GGG GTG TTG AAG GTC TCA AA      |
| Auts2 Mouse Fvd         | GAT GCA GTC AGA CCC ACA CA      |
| Auts2 Mouse Rev         | CGG CCG GTT AAA AGG CTC TA      |
| B2M Mouse Fvd           | GGA GAA TGG GAA GCC GAA CA      |
| B2M Mouse Rev           | TCT CGA TCC CAG TAG ACG GT      |
| Caln1 Mouse Fvd         | AAC GGC TTC ATC TCC AAG CA      |
| Caln1 Mouse Rev         | TGC ATG TCG AAC TGC CAG AA      |
| Prodynorphin Mouse Fvd  | AGG TTG CTT TGG AAG AAG GCT     |
| Prodynorphin Mouse Rev  | GAC GCT GGT AAG GAG TCG G       |
| Proenkephalin Mouse Fvd | GAG AGC ACC AAC AAT GAC GAA     |
| Proenkephalin Mouse Rev | TCT TCT GGT AGT CCA TCC ACC     |
| Gapdh Mouse Fvd         | AAC TTT GGC ATT GTG GAA GG      |
| Gapdh Mouse Rev         | ACA CAT TGG GGG TAG GAA CA      |
| RNA18S5 Mouse Fvd       | AGG GGA GAG CGG GTA AGA GA      |
| RNA18S5 Mouse Rev       | GGA CAG GAC TAG GCG GAA CA      |
| Wbscr17 Mouse Fvd       | AGA CGC CTT CCA CGA GAT CC      |
| Wbscr17 Mouse Rev       | GAT AAG CCA TTA AGC TGC CTG T   |
| Auts2 Rat Fvd           | GAT GCA GTC AGA CCC ACA CA      |
| Auts2 Rat Rev           | CGG CCG GTT AAA AGG CTC TA      |
| B2M Rat Fvd             | GTT TGA GGC CAG TCT GGG AG      |
| B2M Rat Rev             | GCA CTG GCT CTT TGT TTC CC      |
| Caln1 Rat Fvd           | AAC GGC TTC ATC TCC AAG CA      |
| Caln1 Rat Rev           | TGC ATG TCG AAC TGC CAG AA      |
| Wbscr17 Rat Fvd         | GCC TCA GGC AAG CTT TGT TC      |
| Wbscr17 Rat Rev         | GGC AGT CCC AAC AGA ATG GA      |
| Actin Human Fvd         | GTT GCT ATC CAG GCT GTG CT      |
| Actin Human Rev         | GAG GGC ATA CCC CTC GTA GA      |
| Auts2 Human Fvd         | GAT GCA GTC AGA CCC ACA CA      |
| Auts2 Human Rev         | CGG CCG GTT AAA AGG CTC TA      |
| B2M Human Fvd           | TTA AGT GGG ATC GAG ACA TGT AAG |
| B2M Human Rev           | AGC AAG CAA GCA GAA TTT GGA A   |

|                                     |                                                    |
|-------------------------------------|----------------------------------------------------|
| Caln1 Human Fvd                     | GCC CAG CAA GAG GGA AAA GA                         |
| Caln1 Human Rev                     | AGA TGA AGC CGT TCC CAT CC                         |
| Gapdh Human Fvd                     | TGG GCA GCC GTT AGG AAA G                          |
| Gapdh Human Rev                     | AGT TAA AAG CAG CCC TGG TGA                        |
| Wbscr17 Human Fvd                   | TGT CTG GTT GAC CAC AGA GC                         |
| Wbscr17 Human Rev                   | CCT TGC CAC CAC AGT GAA GA                         |
| <b>ChIP (all mouse)</b>             |                                                    |
| Auts2 -2 Fvd                        | TCG CTA AGC TGT ATG CCT GG                         |
| Auts2 -2 Rev                        | GAA CCA TCC GTG GAG AAG GG                         |
| Auts2 -1 Fvd                        | TTG AAG CGC TGG AGG TAA GG                         |
| Auts2 -1 Rev                        | ACA ACC CCA CAC CCA ACA AT                         |
| Auts2 4C Fvd                        | GGC TCC GAC AAG GAA GAC AA                         |
| Auts2 4C Rev                        | AGC TGG TCA TGG CAA ATC CA                         |
| Auts2 +1 Fvd                        | GGC GCG GTT AAA AGA ACC AT                         |
| Auts2 +1 Rev                        | GTG ATC GAG ACC TCC GCT TT                         |
| Auts2 +2 Fvd                        | GGG AGG GAA AAG CCC GTG                            |
| Auts2 +2 Rev                        | GAT CTT CCC CGT TCA CCT ACC                        |
| Auts2 +3 Fvd                        | GCA AGG CGA TTT CAG TGG TG                         |
| Auts2 +3 Rev                        | GCC GAG CAA AGT AAT GG CTG                         |
| Auts2 +4 Fvd                        | CGT GGT TAT GCT CCC CTC TC                         |
| Auts2 +4 Rev                        | AAT GCA TCC AAG GGA AGC CA                         |
| Caln1 4C.1 Fvd                      | GTG AAC TCG TGT CTT GGG CT                         |
| Caln1 4C.1 Rev                      | AAG GCA CTG CTG GAT GTC TG                         |
| Caln1 4C.2 Fvd                      | AGA CAT CCA GCA GTG CCT TC                         |
| Caln1 4C.2 Rev                      | CAG GTG CAT GGG GAG ATG AG                         |
| Caln1 4C.3 Fvd                      | GCC AGG AGG CTC ACA AGA TT                         |
| Caln1 4C.3 Rev                      | GGT GTG TAC CAC AGC CTC TC                         |
| Caln1 4C.4 Fvd                      | TGG GAG AGC CTG TCT CAG AA                         |
| Caln1 4C.4 Rev                      | CAC CGT GTG CTG GTA GAC AT                         |
| Caln1 4C.5 Fvd                      | GTC ACA GGA TAG GAT GCA GGT                        |
| Caln1 4C.5 Rev                      | ACC CTC CCT CTA CAG TTG CT                         |
| Caln1 4C.6 Fvd                      | GGC TCA TTT GCA TGC TGT CA                         |
| Caln1 4C.6 Rev                      | GTC TGA AGG TGT CCT GTG GC                         |
| <b>Bisulfite sequencing (mouse)</b> |                                                    |
| Auts2 F2 Fvd                        | GGG GYG GAG GAT GGG GGT TTT TTA TTG TTT TTT TTG    |
| Auts2 F2 Rev                        | TCT CTT TTC CCC CCT ACC CTC CCT TCT TAT TCT TCT TC |
| Auts2 Pi Fvd                        | TTT GAA TTT TTT TTT TTT TAT TTA TTT GTT GTG GAG GG |
| Auts2 Pi Rev                        | AAC TCC RAC AAA AAA AAC AAT AAA AAA CCC CCA TCC TC |
| Auts2 Rho Fvd                       | GAA TAA GAA GGG AGG GTA GGG GGG AAA AGA GAA AG     |
| Auts2 Rho Rev                       | TCA ACT CRC TCT CCA ACC CTA ACT TCC CTT AAA TAC    |
| Caln1 F1 Fvd                        | TTA TAA GAT TTA GGG GAG TTA AAA TTG GGG AGA TG     |
| Caln1 F1 Rev                        | ATA TAT ACA AAA ACC AAA AAT CCC AAT CAA ATA TCT C  |
| Caln1 No2 Fvd                       | TTA GGG TTG TAG ATA TAG TAA ATA ATG GTT GTG GGG    |
| Caln1 No2 Rev                       | CTC TCT CTT TCA ATC TCT CTC TCT CTA TCT CTT TCT C  |
| Caln1 No3 Fvd                       | AAT AAA GTA GGA AGG GAT AGA AGG AGA TAT TTG ATT G  |
| Caln1 No3 Rev                       | AAA TAAA ACA ACA ACT CAT CAA AAC TAC ATA CC        |

| <b>Guide-RNAs (mouse)</b> |                           |
|---------------------------|---------------------------|
| gcontrol                  | TGG GCT CCA CAA CCC ATG A |
| gAuts2.1                  | GGA GTC CAT GTC CCC GCG T |
| gAuts2.2                  | CCC CGC GTC GGG CCA TCC A |
| gAuts2.3                  | ATG GTT CTT TTA ACC GCG C |
| gAuts2.4                  | GGT TCT TTT AAC CGC GCC G |
| gCaln1.1                  | AGT AAA GTC CTT ACC GTA T |
| gCaln1.2                  | CTT ACC GTA TAG GCA AGC A |
| gCaln1.3                  | ACA CCC GCA GTC CTA GTG C |
| gCaln1.4                  | ACA AAT GTC TAC CAG CAC A |
| gCaln1.5                  | GGG AGG GAC CGT TAT TCA G |

**Figure S1. Locations of primers and guide RNAs****4C-fragment (rat)****Fvd**

AGCGGAGGTGCG**GATCACAGCGAGACCGGGAGAG**ACGCTCCCGGGCCGGCTTAGGAACCGGTGCGGCGGG  
 TGGTATAGGAACCGGCCGGACCCGGGCTCCCTCGCTGGCTTCATCGTCGGGCTCCGACAAGGAAGACAAT  
 GGAAAGCCCCATCCTCCGCCCCGTCCCGGCCAGACCCCGCGGAGGAAGCGCAGAGAGTCCACCTCAG  
 CCGAAGAGGACATCATTGATGGATTTGCCATGACCAGCTTTGTTACTTTTGAAGCGCTGGAGGTAAGGGG  
 GGGACCCCTTTCTGTTCCCC**CCATGG**TTTCCTTTTATGCATGACACCCC

**Reverse complement**

GGGGTGTGCATGCATAAAAGGAAA**CCATGGGGGAAACAGGAAAGGG**GTCCCCCTTACCTCCAGCGCTT  
 CAAAAGTAACAAAGCTGGTCATGGCAAATCCATCAATGATGTCCTCTTCGGCTGAGGTGGACTCTCTGCG  
 CTTCTCCGCGGGGTCTGGGCCGGACGGGGCGGAGGATGGGGGCTTCCATTGTCTTCCTTGTGCGGAG  
 CCCGACGATGAAGCCAGCGAGGGAGCCCGGTCCGGCCGGTTCTATAACCACCCGCCGCACCGGTTCTTA  
 AGCCGGCCCCGGGAGCGTC**TCTCCCGGTCTCGCTGTGATC**GCGACCTCCGCT

**Nco1** Fvd CCCTTTCCTGTTCCCCCA

**Dpn2** Rev **TCTCCCGGTCTCGCTGTGA**

Location 3C-primers (rat)

Auts2

chr12: 27153362-27155765 Fvd strand

AAGTGTCCGGAGAAAGGTGCCTGCTACGCGTGCGCGCGAGTCCTCCGTGCGTTTGGCGGGATGTTGGG  
GCAGCCTCCACGCCCTCGAACTTCAACTCCACACGGGCCCCGTGACCGACCCCTCCAACATAACCCACAGC  
CTCTGGAGACCCCTTCCGCCCCCAAGTGCGCAGGCCCGGCCGCCCCAGCGCGCATGCCCTGGGCTCGTGG  
AGCGGTGGCCAGCCCCTCAGCCTTTTGGCTTTCTACACACTCTACAACCTAGGGGAGGGGGCGGGTCACG  
TGATCCAGCCGGCCCCGAGGCGCGCGGGAGGAGACGTGGGGGGGTAGGACGGGAACGCGCGTGGGAGAGA  
GGGAGAGAGGCGCGAGGGGAGGGGCTCTTCTCGGGAGCGCGCAGCCAGTGGTGATGAGTGAAGGGGCG  
GCCCTCGGGAGCGCGCCCCGTGGTGC CGGGGTGGTGGTGGGGGGATTGCGGGGGGAGAGAACGAGGCGT  
GAGAGATTCTCGGGAGCCCCGGAAGGGGGAAAGGGGGCGGCCCTCGGGAGCGCGCCGAGTGAGGCGTGAGG  
GGAGGGGGGAGCCCTCGGGAGCGCGAGGAGAGCCAGGAGGGCGGTCTCGGGAGCGCGCGCAGAGCGAGG  
CGCGAAGAGGGCGGTCTTCCAGAGCGCTCGCCGGCGAGCGAGCTCGAGCGCGCGTCAAGAGAGAGAGAG  
GGAGAGAGAGAGGGAGAGAGAGAGACGGCAAGCGGGCGGGCGTGGGGCTGGGCCGAGGCGGGCGGCGCG  
GTGGGCCGGCCAGAGGGGGAGGAGCGGGCGCTGTGTGAGCGAGGCGGGCGGAGGATGAGGCCGTGCCCGG  
GCTCTGGCTGCAGCCCGCCGGGGACACGCCGTGCACCGTCTCGGGCTCGGGGCTCCGGCGGCGGGCGGCTGAG  
GCAGCGTTAGCTGCGAGCGAGCGAGCGAGTGTGAGCGAGCGGCATCTCCAGCGCTTCTTCTCAGGCGGGG  
CGACGCGAAGAAGAAGAAGAGGCGGCGGGCGGGCGGGCGGGCGGGCGGGCGGGCGGGCACCACACCGGTGTA  
TCTCGGTTGGAGACTGCTCTTTGCTTTTCTCATTGACTGACTCGCCCCCCTTTATAATTTTTTTTTTTTT  
TTGAGGAAGGGTGACCTCTGAACTGGGGTGGGGGGAGACAATTTGTGTGCGTGCCTGCATGTGTATGTG  
AGGAGGGGGTGGTGACGCGCCAGGCTTTGCAATTTCTTCTCTTCTTTTCTCTTTTCTCTCTCTCTCTCT  
CCCCATCGAAGACCGAAAAAAGAAAGGGAGAAAAAATAATCCACAACCTGCTTTCAGCGTCTCTCTCT  
CTTCCCTTCTCTCTCTCTCGGGCAACCTCTGTCTCCGCTCGTGATTGCGTGGTTATGCTCCCCCTCTCTG  
GGGGTCTCGCCCCCTCTCAGCTCGCTCTCTAGCCCTGGCTTCCCTTGATACATTTCTTAAAAAAGACT  
AGGAGCCCGGAGTGAGTTTTCTGCGAGACGAGTGTGTGAGAGAGGCGGAGGTGTGGGTGTTTTCTCTG  
CACGAGGGGGCGGGTGAAGTTCATTGCCACCCACCCCTCACTTACCCTGACCTTTTCGGACCTCGGGCT  
TTTTTTTTTCTTTAATTTTTTTTTTGGGGGGGGGTCTCTAGGAAAAGCGAGAAGCCAAGCGATTTAGTG  
GTGGGAGAGAGCATGCCGCGGGGAGGGCTTCCCAGTCTCTTGATCAAAGCATTCGGCTATTCTGATT  
TATTGCCTGCTGGTGAGTTATTTTTTTTCCCCTTCTCTGTAAAGGAGACCTGTGTGTTTTCAGCCATTAC  
TTTGCTCGGCGCTGTTTCGAGGCATCTCCGACCCCTCGGTGCAGAGGGGAGCCCCACACTTCGCCCTCTCG  
CTTCCCCGTCCCTCCCTCCCGTCTCCCGCCCCCTTCCCCCTTTTTTCTTTCTCTTTTTTCCCCCTGCCCT  
CCCTTCTTGTCTCTTCTGGGCTTCTTTTTTTTTTTTTTTTTTTTTTTTTTTTTTTTTTTTTTTTATTCCCTCC  
AGCCGCTTCTCCCCCGCGCCCTTCTCGCGGCTGGAGGAAAAGCCCGTGCAGGAGAAGCGGGGGGGCT  
CGGTGTCAATTTTTTTTTTTCTTCTGGTGTGTGTGTGTGTGTGTGTGTGTGTGTGTGGCCCGGCCGAG  
CCTGTGGCGCGCGGGTAGGCGAACGGGGAAGATCCCCGGCGCGGTAAAGAAGCATGGATGGCCCCGACG  
CGGGGACATGGACTCCGAAAAAGCGGAGGTGCGGATCACAGCGAGACCGGGAGAGACGCTCCCGGGCCG  
GCTTAGGAACCGGTGCGGCGGGTGGTATAGGAACCGGCCGGACCCGGGCTCCCTCGCTGGCTTCATCGTC  
GGGCTCCGACAAGGAAGACAATGGCTTCATCGTCTGGGCTCCGACAAGGAAGACAATGGAAAGCCCCATC  
CTCCGCCCCGTCCCGGCCAGACCCCGCGGAGGAAGCGCAGAGAGTCCACCTCAGCCGAAGAGGACATC  
ATTGATGGATTTGCATGACCAGCTTTGTTACTTTTGAAGCGCTGGAGGTAAGGGGGGACCCCCCTTTCC  
TGTTCCCCCATG

3C Auts2; Nla3 restriction site; 4C-bait; 3C-control

Caln1 4C-fragment

chr12:29680069-29681962 Fvd strand

GTGTGCTGAGGTCCTCTATGGTGTCTGAAGGTGTCCTGTGGCTCATTATGATATTAAGCAGAGGTGGGG  
TCTTATGATGCATGAAATTGTATATACAACACTATATGTAACAGCATGCAAATGAGCCTTGCTATGTAAATG  
AGCCAAAAGCTGGTGCTGAATTAACACAAAAGCCCCAGCTCTTTATGTAGCAGGGCAGTTGAGTGTTGAA  
ATTAATATCTGTCTGTCTGTCTCTCTCTCTCTCTCTCTCTCTCTCTCTCTCTCTCTCTCTCTCTCTCTCTCT  
CTCTCTCTCTCTCTCTCTCTCTCTCTCTCTCTCTCTCTCTCTCTCTCTCTCTCTCTCTCTCTCTCTCTCTCTCT  
TCTGTCTCTCTCTCATGTTCCCTGTGTGTCTCTTTCTCTCTGTGTGTCTGTCTCTCCATATCTCTCTGTG  
TCTCTGTCTCTCTGTCTCTCTCTGTCTCTCTGTCTCTGTCTGTCTGTCTCTGTGTGTGTG  
TCTGTCTCTCCATCTCTCTGTGTGTCTCTGTGTGTGTCTGTTTCTGTCTCTCTGTCTCTCTCTCTCTCTCT  
TGTCTCTCTCTCTGTCTCTCTCTCTCTCTCTCTCTCTCTCTCTCTCTCTCTCTCTCTCTCTCTCTCTCTCTCT  
AACTGTATCTTCTCCTAACCAACCCTGTTAGAAAGTCTATTCTTCTTAAATCAGTAAACCCTCCCCCTAC  
ATTTGCTACCGTTTGCTGCTTTTGTCTATTCTTTGTTCTGATAACAAGTACCTGCATCCTGTCCGTGTG  
GCTATGAAATCTCTAGACATCAGCCCCACCAGCAGAAAGCCCACCCAGGATGGGGCGACAACCTCAGCAA  
AGCTGCCTGTCTCCTGGAGCCTGCCCGGACAGCTCCACTGAATAATGCCTCCTCCCCACAGCCTTTATT  
TACFGTGCCGATAACCCTGGTGTGGGCGCTTGGGAATCCTAAAATTTATTAGCTTCTGAACCTCGGAG  
GAGAGCAGGTTGTGGGGATGTGTTGCATGCACATTTTCGTGTGGGTGTGTGCACATACTGTGTGCTGGTA  
CACATTTGTAAGAGTGTATGCAGAAGCCAGAGATCCAGTTCAGTTGTCTTCTCTACCGGTTTCTGCTTT  
GTTTTTTGAGACAGGCTCTCCCACTGAACCCAGAGCTTACCAGTTCGTGTAAGCCGGTTAGGGCTCCTAC  
TTATCTGCCTCCTCAGCACTAGGACTGCAGGTGTGCACCACAGCCCCCTGGCTCCTTTATGTGGGTGCTG  
GGGTCTAAACTCAAGATTTTACTTACCTGTATGGTAAACAATTTACTGATTGAGGCGCCTCCCCGAT  
CTTGGCTCCCCTAAATCTTGTGAGCCTCCAGGCTCCCTCCAGTGAAGAATCTTTCCATTTCAGAGGAAATA  
GAAACACAATAACACATCCTTTAAAAGTTAGCCAGGATGCAAGTTCGGGAGACTTAAATAATGTCTGGTC  
TGTGTAGATGCCTGAGAATAACACAAGGTGAGACAGACGGCCCCACCACACCCCCAGCAGCCACCTGGC  
TGAGCCTTTGGTCCAGGTGCATGAGGATGAGGCAGGCTAGACAGGCCCTGCCAACAGCAGCCAGAATG  
TCACAATTGGGCACAGAGTCATCCAACAGTCTGGCACAGGTCAGTGAATGCAGGAAGGCACTGCTGGAT  
GTCTGCTAGTGAGAGACATGAGCTGATGGGGTGTGCTGACCGCAGAAGCAAAAATGAGCTTAACTAAGG  
ACCTGAGTTACCTGAAGGATGTATGGGGAAAGACTGTCCCTCACTACCTAACCTTCACAGAGACATCAG  
GTCGATGGGGTCAGAATCTGCTGCGGGGAGGAGGACTTTTCTGGTTCTGAATGGAGACTTGAAGGAT  
GACT

**3C Auts2; Nla3 restriction site**



## Caln1 – 4C-predicted fragment (mouse)

*converted from rat to mouse via UCSC genome browser BLAT-tool*

&gt;mm10\_dna range=chr5:130474541-130476365 Forward strand

**CCAAGGTTGATGCCTGGGA**ACATCTTCCATCTCTCTTCCCCATTATTTACTGAGGCAGAATATGTCACCTC  
 AAACCCAGAACTTACCCCTATGGCTACTGTAGCTAGCTAGCTTGGCTCTGGGGGGAACCC**CATG**TCTCTGC  
 TTCTTTCCACATCAGGAACAACAGGCTGGCTCTCATAGTTCTGGGGATTTGAACTTTCGTCTTATGCTT  
 GTCCAGCAAGTCCTTTAGCCACTGAGCCATTCTACC**A**GTCTCCATTCAGAACCAAGAAAAGCCCCCTCCTC  
 CCCTACAGCAGATT**CTGCTCTGACCCCAATTGTCC**CTATGCCTCTGTGAAAGTTAGGTAGTGAGGGACAGT  
 CTTTCCCGATACATCCTTCAGGTGAACTCGTGTCTTGGGCTAAAGCTCATTTTTGGCTTCTGCGGT**CATCA**  
 CACCCCATCAGCT**CATG**CCTCTCACTAGCAGACATCCAGCAGTGCCCTTCTGCATTCACTGACCTGTGCC  
 AGACTGTTGGGATGACTCTGTGCCAATTGTGACATTCGGGCTGCTGTTGGCAGGGCCTGTCTAGCCTGC  
 CTCATCTCCC**CATG**CACCTGGACCAGAGGCTCAGCCAGGTGGTTGCTGGGGGATGGTGGGGGTGGCAGTC  
 CATCTGACCTTATGTTATTCTCGGGCATCTACATAAACCAGACATTAATTT**CAGTCTCTGGA**ACTCTTGTCTC  
 CCGACTGTTCTGTAACCTTTTTAAGGA**CATG**CTACTGAGTTTCTATTTCCCTCTGAATGGAAAAGATTCTTT  
 ACTGGCGGGAGCCAGGAGGCTCACAAAGATTTAGGGGAGCTAAAATTTGGGGAGATGCCTCAATCAGTAAAG  
 TCCTTACCGTATAGGCAAG**CATG**GGATCCTAAGTGTAGGTCCCAGCACCCACATAAAAGAGCAGGGGGT  
 AGGGGGAGAGGCTGTGGTACACACCCGCAGTCTAGTGCTGGAGAAGCAGAGCTAAGTAGGCTCCTTAGC  
 TAGCTTAGCTGCATTGGTAAGCTCTGAGTTCAGTGGGAGAGCCTGTCTCAGAAAAACAAAGCAGGAAGGG  
 ATAGAAGGAGACACTTGACTGGGACCTCTGGCTTCTGCACACACTCATAACAAATGTCTACCAGCACACG  
 GTGCGTGCACACACCTATACAAAAAAATGTGCATACAACCCATACCCACAAC**CTGCTCTCCTCCAAGGTT**  
**C**AGGAAGCTAATGAAATTTTAGGATTTCCCAAGGCCCCACCCAGGGTTGTAGACACAGTAAATAATGGCT  
 GTGGGGAGGGACCGTTATT**CAGTGGAGCTGTCTGGGGCAGGCTCCAGGAGG****CATG**CAGCTTTGATGAGTT  
 GTTGCCCATCTTGGGGTGGGTTTTCTGTAGATGGCACTGATGTCTAGAAATTTTGTAGTACAGGATAG  
 GATGCAGTACTTGTATCCAGGAACAAAGAATAGGTCAAAGGCAGCAAAGCTGTAGCAACTGTAGAGGGAG  
 GGTTTACTGATTGAAGAAGAATAGACTTTCAAATAGTGTGGTTAGGAAAAGATACAGTTGAGAGAGAGA  
 AAGAGACAGAGAGAGAGAGATTGAAAGAGAGAGACAGGAGAGAGAGAGAGAGAGAGAGAGAGAGAGAGAG  
 AGATTTCAACAGCTCAAGTGCCCTGTTACATAAAGAGCTGGGGCTTTTGTGTTAATTCAACATCAGCTTT  
 TGGGCTTATTTACATAGCAAGGCTCATT**GT****CATG**CTGTACATATAGTTGTATATACACTT**CATG**CATT  
 GAGTATCTCATT**GCATCATAAGACCCACCTCTGTTTTAATATCATAATTAGCCACAGGACACCTTCAG**  
 ACAC**C**

green to green: 4C-predicted fragment; **3C Caln1**; **Nla3 restriction site**; **3C control**



Location ChIP-primers (mouse)

## Auts2

chr5:132541150-132542774 &gt;mm10\_dna Reverse strand

TGCAATTCTTCTCTTCTTTTCATCTTTTTCTCCTCCTCCCCCCTTGAAGACCGAAAAAAAAAAATCCCAC  
 AACTGCTTCAGCGTCCTCCTCCTTCCCTTCCCTTCCCTCGGGCAACCTCTGTCTCCGCTTGTGATTGC  
 GTGGTTATGCTCCCTCTCTGGGGGGTCTCGCCCTCTCAGCTCGCTCTCCAGCCCTGGCTTCCCTTGGG  
 TGCAATTTCTAAAAAAGACTGGGAGCCCGGGAGTGAGTTTTTCTGCGAGGCGAGTGTGTGAGAGAGGCG  
 GAGGTGTGGGTGTTTTCTGCACGAGGGGGCGGGTGAAGTTCATTGCCACCCACCCCTCACTTCACCGT  
 GACCTTTTCGGACCTCGGGCTTTTTTTTTTTTTAAAAATTTTTTGGGGGTCTCTAGAGAAAGGGAGAAGCA  
 AGGCGATTTTCAGTGGTGGGAGAGAGCATGGCCGCGGGGAGGGCTTCCCAGTCTCTTGATCAAAGCATT  
 CCGCTATTCTGATTTATTGCCTGCTTGGTGAATTTTTTTTTCCCCTTTTCTCTGTAAAGGAGACCTGT  
 GTGTTTCAGCCATTACTTTGCTCGGCGCTGTTTCGCAGGCATCTCCGACCCTCGGTGCAGAGGGGAGCCCCA  
 CACTTCGCCCTCTCGCTTCCCCGTCCCTCCCTCCCCGTCTCCCCGCCCTTCCCCCTTTTTTCTTCTCT  
 TTTCCCCCTGCCCTCCCTTCTTGTCTTCTTTCGATTCTTTTTTTTTTTTTTTTTTTTTATTTCTCCAG  
 CCGCTTCTCCCCCGGCCCTTCTCGCGGCGGGAGGGAAAAGCCCGTGCAGGAGGAAGGGGGGCTCGGT  
 GTCAATTTTTTTTTTCTTCTTGGGGTGTGTGTGTGTGTGTGGCCGCGGCCCGAGCCTGTGGCGCGCGG  
 GTAGGTGAACGGGGAAGATCCCCGGCGGTTAAAAGAACCATGGATGGCCCGACGCGGGGACATGGACT  
 CCGGAAAAGCGGAGCGAGACCCGGGAGAGACGCTCCCGGGCCGGGTAGGAACCGGT  
 GCGGCGGGTGGTATAGGAGCCGGCCGGACCCGGGCTCCCTCGCTGGCTTCATCGTCGGCTCCGACAAGG  
 AAGACAATGGAAAGCCCCATCCTCCGCCCGTCCCGGCCAGACCCCGCGGAGGAAGCGCAGAGAGTC  
 CACCTCAGCCGAAGAGGACATCATTGATGGATTTGCCATGACCAGCTTTGTTACTTTTGAAGCGCTGGAG  
 GTAAGGGGGGACCCCTTTTCTGTTCCCCCATGGTTTCCTTTTATGCATGACACCCCCACACTCGGCT  
 GCACCCCGGTTTTCTTGCCTCCCCCGCCGCACTCGAAGCTCTCAGTCTCGGCCGAGGTCTTATTGTTGGG  
 TGTGGGGTTGTATGTAGGGGGAGCTGGGGGCAGATTGGCAGCAAGGAGGGAATCGCTAAGCTGTATGCCT  
 GGTCTGGTCTTCTACTGGTTTTCGTTCTTGTCCAGCTTGCCTTTCCCTTGCGCCCTTCCCTGCACCCCA  
 CCTCCCTCCACAGCAGATGGGTGGAAAGAAAGGGGTTTCAGGCATCACAAATGCGCCCCCTTCTCCAC  
 GGATGGTTCTACCC

Primer location color code:

Auts2 +4, Auts2 +3, Auts2 +2, Auts2 +1, Auts2 4C, Auts2 -1, Auts2 -2

4C-bait: green

## Caln1 – 4C-predicted fragment (mouse)

chr5:130474787-130476365 Forward strand

AGTCTCCATTTCAGAACCAAGAAAAGCCCCTCCTCCCCCTACAGCAGATTCTGCTCTGACCCCATTG  
TCCCTATGCCTCTGTGAAAGTTAGGTAGTGTAGGGACAGTCTTTCCCGATACATCCTTCAGGTGAA  
CTCGTGTCTTGGGCTAAAGCTCATTTTTGCTTCTGCGGTTCATCACACCCCATCAGCTCATGCCTC  
TCACTAGCAGACATCCAGCAGTGCCTTCCTGCATTCACTGACCTGTGCCAGACTGTTGGGATGAC  
TCTGTGCCCAATTGTGACATTCCGGCTGCTGTTGGCAGGGCCTGTCTAGCCTGCCTCATCTCCCC  
ATGCACCTGGACCAGAGGCTCAGCCAGGTGGTTGCTGGGGGATGGTGGGGGTGGCAGTCCATCTG  
ACCTTATGTTATTCTCGGGCATCTACATAAACAGACATTATTTTCAGTCTCTGGAACCTTTGTCC  
CGACTGTTCTGTAACCTTTTTAAGGACATGCTACTGAGTTTCTATTTCTCTGAATGGAAAAGATT  
CTTTACTGGCGGGAGCCAGGAGGCTCACAAGATTTAGGGGAGCTAAAATTGGGGAGATGCCTCAA  
TCAGTAAAGTCCTTACCGTATAGGCAAGCATGGGATCCTAAGTGTAGGTCCCCAGCACCCACATA  
AAAGAGCAGGGGGTAGGGGGAGAGGCTGTGGTACACACCCCGCAGTCCTAGTGCTGGAGAAGCAGA  
GCTAAGTAGGCTCCTTAGCTAGCTTAGCTGCATTGTAAGCTCTGAGTTCAGTGGGAGAGCCTGT  
CTCAGAAAAACAAAGCAGGAAGGGATAGAAGGAGACACTTGACTGGGACCTCTGGCTTCTGCACA  
CACTCATAACAAATGTCTACCAGCACACGGTTCGTGCACACACCTATACAAAAAATGTGCATAC  
AACCCATACCCACAACCTGCTCTCCTCCAAGGTTTCAGGAAGCTAATGAAATTTTAGGATTCCCAA  
GGCCCCACCCAGGGTTGTAGACACAGTAAATAATGGCTGTGGGGAGGGACCGTTATTTCAGTGGA  
GCTGTCTGGGGCAGGCTCCAGGAGGCATGCAGCTTTGATGAGTTGTTGCCCATCTTGGGGTGGG  
TTTTCTGTAGATGGCACTGATGTCTAGAAATTTGTAGTTCACAGGATAGGATGCAGGTACTTGTA  
TCCAGGAACAAAGAATAGGTCAAAGGCAGCAAACCTGTAGCAACTGTAGAGGGAGGGTTTACTGAT  
TGAAGAAGAATAGACTTTCAAATAGTGTGGTTAGGAAAAGATACAGTTGAGAGAGAGAAAGAGA  
CAGAGAGAGAGAGATTGAAAGAGAGAGACAGGAGAGAGAGAGAGAGAGAGAGAGAGAGAGAGA  
GATTTCAACAGCTCAAGTGCCCTGTTACATAAAGAGCTGGGGCTTTTGTGTTAATTCAACATCAG  
CTTTTGGGCTTATTTACATAGCAAAGGCTCATTTGCATGCTGTACATATAGTTGTATATACAACT  
TCATGCATTGAGTATCTCATTTGCATCATAAGACCCACCTCTGTTTTAATATCATAATTAGCCA  
CAGGACACCTTCAGACACC

Primer location color code:

Caln1 -4, Caln1 -3 F, Caln1 -2 F, Caln1 -1 F, Caln1 +1 F, Caln1 +2 F

Location Bisulfite-primers

Aut2 (mouse)

chr5:132541150-132542774 Reverse strand

TGCAATTCTTCTCTTCTTTTCATCTTTTTCTCCTCCTCCCCCCTTGAAGACCGAAAAAAAAAAT  
 CCCACAACCTGCTTCAGCGTCCTCCTCCTTCCCTTCCCTCCTTTTCTCGGGCAACCTCTGTCTCCGC  
 TTGTGATTGCGTGGTTATGCTCCCCCTCTCTGGGGGTCTCGCCCCCTCTCAGCTCGCTCTCCAGCC  
CTGGCTTCCCTTGGATGCATTTCTTAAAAAAGACTGGGAGCCCGGGAGTGAGTTTTTCTGCGAG  
 GCGAGTGTGTGAGAGAGGCGGAGGTGTGGGGTGTTTTCTGCACGAGGGGGCGGGTGAAGTTCAT  
 TGCCACCCACCCCTCACTTCACCGTGACTTTTTCGGACCTCGGGCTTTTTTTTTTTTAAAAATTTT  
 TTGGGGGTCTCTAGAGAAAGGGAGAAGCAAGGCGATTTTCAGTGGTGGGGAGAGAGCATGGCCGC  
 GGGGAGGGCTTCCCCAGTCTCTTGATCAAAGCATTCGGCTATTCTGATTTATTGCCGTGTTGGTG  
 AGTTATTTTTTTTCCCCCTTTCCTCTGTAAAGGAGACCTGTGTGTTTCAGCCATTACTTTGCTCGGC  
 GCTGTTTCGAGGCATCTCCGACCCTCGGTGCAGAGGGGAGCCCCACACTTCGCCCTCTCGCTTCC  
 CCGTCCCTCCCTCCCGTCTCCCGCCCCCTTCCCCTTTTTTTCTTCTCTTTTCCCCCTGCCCT  
CCTTCTTGTTCTTCTTCGGATTCTTTTTTTTTTTTTTTTTTTTTTTTATTCTCCCAGCCGCTTCTC  
 CCCC

CGCCCTTCTCGCGGCGGGAGGGAAGCCCGTGCAGGAGGAAGGGGGGCTCGGTGTCAA  
TTTTTTTTTTCTTCTTGGGGTGTGTGTGTGTGTGTGGCCGCGGCCGAGCCTGTGGCGCGCGG  
GTAGGTGAACGGGAAGATCCCCGCGCGGTTAAAAGAACCATGGATGGCCCCGACGCGGGGACAT  
GGACTCCGAAAAAGCGGAGGTCTCGATCACAGCGAGACCGGGAGAGACGCTCCCGGGCCGGGTT  
AGGAACCGGTGCGGCGGGTGGTATAGGAGCCGGCCGGACCCGGGCTCCCTCGCTGGCTTCATCGT  
CGGGCTCCGACAAGGAAGACAATGGAAAGCCCCCATCCTCGCCCCGTCCCGGGCCAGACCCCCG  
CGGAGGAAGCGCAGAGAGTCCACCTCAGCCGAAGAGGACATCATTGATGGATTGCCATGACCAG  
CTTTGTTACTTTTGAAGCGCTGGAGGTAAGGGGGACCCCTTTTCTGTTCCCCCATGGTTTCC  
 TTTTATGCATGACACCCCCACACTCGGCTGCACCCCGGTTTTCTTGCCTCCCCCGCCGCACTCG  
 AAGCTCTCAGTCTCGGCCGAGGTCTTTTGTATGTAGGGGAGCTGGGGCAGATTGGCAGCAAGG  
 AGGGAATCGCTAAGCTGTATGCCTGGTCTGGTCTTCTACTGGTTTCGTTCTTGTCCAGCTTGCCT  
 TTCCCTTGCGCCCTTCCCTGCACCCCCACCTCCCTCCACAGCAGATGGGTGGAAAGAAAGGGGT  
TCAGGCATCAACAATGCGCCCCCTTCTCCACGGATGGTTCTACCCC

Primer location color code (non-BS-converted analogue, reverse complements shown):

Aut2 F2 F, Aut2 F2 R, Aut2 Pi F, Aut2 Pi R, Aut2 Rho F, Aut2 Rho R

4C-bait: green; ChIP-changes: yellow

## Caln1 (mouse)

chr5:130474787-130476365 Forward strand

AGTCTCCATT CAGAACCAAGAAAAGCCCCTCCTCCCCTACAGCAGATTCTGCTCTGACCCCATTTGTCCCT  
 ATGCCTCTGTGAAAGTTAGGTAGTGAGGGACAGTCTTTCCCGATACATCCTTCAGGTGAACTCGTGTCTT  
 GGGCTAAAGCTCATTTTTGCTTCTGCGGTCATCACACCCCATCAGCTCATGCCTCTCACTAGCAGACATC  
 CAGCAGTGCCTTCTGCACTTCACTGACCTGTGCCAGACTGTTGGGATGACTCTGTGCCCAATTGTGACAT  
 TCCGGCTGCTGTTGGCAGGGCCTGTCTAGCCTGCCTCATCTCCCATGCACCTGGACCAGAGGCTCAGCC  
 AGGTGTTGCTGGGGGATGGTGGGGGTGGCAGTCCATCTGACCTTATGTTATTCTCGGGCATCTACATAA  
 ACCAGACATTATTT CAGTCTCTGGAAC TCTTGTCCCGACTGTTCTGTAAC TTTTAAGGACATGCTACTG  
 AGTTTCTATTTCTCTGAATGGAAAAGATTCTTTACTGGCGGGAGCCAGGAGG**TCACAAGATTTAGGGG**  
**AGCTAAAATTGGGGAGATGCCTCAATCAGTAAAGTCCTTACCGTATAGGCAAGCATGGGATCCTAAGTGT**  
 AGGTCCCAGCACCCACATAAAAGAGCAGGGGGTAGGGGGAGAGGCTGTGGTACACACCCGCAGTCCTAG  
 TGCTGGAGAAGCAGAGCTAAGTAGGCTCCTTAGCTAGCTTAGCTGCATTGGTAAGCTCTGAGTTCAGTGG  
 GAGAGCCTGTCTCAGAAA**AACAAAGCAGGAAGGGATAGAAGGAGACACTTGACTGGGACCTCTGGCTTCT**  
**GCACACAC**TCATAACAAATGTCTACCAGCACACGGTGCGTGCACACACCTATACAAAAAAATGTGCATAC  
 AACCCATACCCACAACCTGCTCTCCTCCAAGGTT CAGGAAGCTAATGAAATTTTAGGATTCCCAAGGCC  
 CACC**CCAGGGTTGTAGACACAGTAAATAATGGCTGTGGGGAGGGACCGTTATT**CAGTGGAGCTGTCTGGG  
 GCAGGCTCCAGGAGGCATGCAGCTTTGATGAGTTGTTGCCCATCTTGGGGTGGGTTTTCTGTAGATGGC  
 ACTGATGTCTAGAAAATTTGTAGT**CACAGGATAGGATGCAGGTACTTGTATCCAGGAACAAAGAATAGGT**  
**CAAAGGCAGCAAAC TGTAGCAACTGTAGAGGGAGGGT**TTACTGATTGAAGAAGAAATAGACTTTCAAATAG  
 TGTGTTAGGAAAAGATACAGTTGAGAGAGAGAAAGAGACAGAGAGAGAGAGATTGAAAGAGAGAGACA  
 GGAGAGAGAGAGAGAGAGAGAGAGAGAGAGAGAGAGATTTCAACAGCTCAAGTGCCCTGTTACATAAAGA  
 GCTGGGGCTTTTGTGTTAATTCAACATCAGCTTTTGGGCTTATTTACATAGCAAGGCTCATTTGCATGCT  
 GTCACATATAGTTGTATATACAACCTTCATGCATTGAGTATCTCATTTGCATCATAAGACCCACCTCTGT  
 TTTAATATCATAATTAGCCACAGGACACCTTCAGACACC

## ChIP-changes

Primer location color code (non-BS-converted analogue):

Caln1 F1 F, Caln1 F1 R, Caln1 No2 F, Caln1 No2 R, Caln1 No3 F, Caln1 No3 R

Location guide-RNAs

Auts2 (mouse)

chr5:132541357-132542348 Fvd strand

CCTACATACAACCCACACCCCAACAATAAGACCTCGGCCGAGACTGAGAGCTTCGAGTGC GGCGGGGGAG  
 GCAAGAAAACCGGGGTGCAGCCGAGTGTGGGGGGTGTTCATGCATAAAAGGAAA CCATGGGGGGAAACAGAA  
 AAGGGGGTCCCCCTTACCTCCAGCGCTTCAAAAGTAACAAAGCTGGTCATGGCAAATCCATCAATGATG  
 TCCTCTTCGGCTGAGGTGGA CTCTGCGCTTCTCCGCGGGGGTCTGGGC CGGACCGGGCGGAGGATG  
 GGGGCTTTCCATTGTCTTCTTGT CGGAGCCCGACGATGAAGCCAGCGAGGGAGCCCGGGTCCGGCCCGC  
 TCCTATACCACC CGCCG CACCGGTTCCCTAACC CGCCCGGGAGCGTCTCTCCCGGTCTCGCTGTGATCGA  
 GACCTCCGCTTTTTTC CGGAGTCCATGTCCC CGCGT CGGGCCATCCATGGTTCTTTTAACCGCGCCGGGA  
 TCTTCCC CGTTCACCTACC CGCGCG CCACAGGCTCGGCCCGCGGCCACACACACACACACACCCCAAG  
 AAGAAAAAAAAAATTGACACCGAGCCCCCTTCTCCTGCA CGGGCTTTTCCCTCCCGCCGCGAGGAAGG  
 GCGCGGGGAGAAAAGCGGCTGGGAGAAATAAAAAAAAAAAAAAAAAAAAAAGAATCCGAAGAAGAACAAGAA  
 GGGAGGGCAGGGGGGAAAAGAGAAAAGAAAAAGGGGAAGGGGCGGGGAGAGCGGGAGGGAGGGGA CGGGG  
 AAGCGAGAGGGCGAAGTGTGGGGTCCCCTCTGCACCGAGGGT CGGAGATGCCTGCGAACAGCGCCGAGC  
 AAAGTAATGGCTGAACACACAGGTCTCCTTTACAGAGGAAAGGGGAAAAAATAACTCACCAAGCAGGC  
 AATAAATCAGAATAGCGGAATGCTTTGATCAAGAGACTGGGGAAGCCCTCCC CGCGGCCATGCTCTCTCC  
 CCACCACTGAAA

4c-bait: green; ChIP-changes: yellow; CGs: purple; guideRNAs: blue; yellow CGs: strong  
 bisulfite changes

## Caln1 4C-bait (mouse)

chr5:130474787-130476365 Forward strand

AGTCTCCATT CAGAACCAAGAAAAGCCCCTCCTCCCCTACAGCAGATTCTGCTCTGACCCCATTTGTCCCT  
 ATGCCTCTGTGAAAGTTAGGTAGTGAGGGACAGTCTTTCC **CG**ATACATCCTTCAGGTGAACT **CG**TGTCTT  
 GGGCTAAAGCTCATT TTTGCTTCTG **CG**GTCATCACACCCCATCAGCTCATGCCTCTCACTAGCAGACATC  
 CAGCAGTGCCTTCTGCACTTCACTGACCTGTGCCAGACTGTTGGGATGACTCTGTGCCCAATTGTGACAT  
 TC **CG**GCTGCTGTTGGCAGGGCCTGTCTAGCCTGCCTCATCTCCCCATGCACCTGGACCAGAGGCTCAGCC  
 AGGTGTTGCTGGGGGATGGTGGGGGTGGCAGTCCATCTGACCTTATGTTATTCTCGGGCATCTACATAA  
 ACCAGACATTATTT CAGTCTCTGGAAC TCTTGTCC **CG**ACTGTTCTGTAAC TTTTAAGGACATGCTACTG  
 AGTTTCTATTTCTCTGAATGGAAAAGATTCTTTACTGG **CG**GGAGCCAGGAGGCTCACAAGATTTAGGGG  
 AGCTAAAATTGGGGAGATGCCTCAATC **AGTAAAGTCCTTACCGTATAGGCAAGCA**TGGGATCCTAAGTGT  
 AGGTCCCAGCACCCACATAAAAGAGCAGGGGGTAGGGGGAGAGGCTGTGGTAC **ACACC** **CG**CAGTCCTAG  
**TGCT**TGGAGAAGCAGAGCTAAGTAGGCTCCTTAGCTAGCTTAGCTGCATTGGTAAGCTCTGAGTTCAGTGG  
 GAGAGCCTGTCTCAGAAAACAAAGCAGGAAGGGATAGAAGGAGACACTTGACTGGGACCTCTGGCTTCT  
 GCACACACTCATA **ACAAATGTCTACCAGCACA** **CG**GTG **CG**TGCACACACCTATACAAAAAATGTGCATAC  
 AACCCATACCCACAACCTGCTCTCCTCCAAGGTT CAGGAAGCTAATGAAATTTTAGGATTTCCAAGGCC  
 CACCCAGGGTTGTAGACACAGTAAATAATGGCTGTG **GGGAGGGAC** **CG**TTATT **CAG**TGGAGCTGTCTGGG  
 GCAGGCTCCAGGAGGCATGCAGCTTTGATGAGTTGTTGCCCATCTTGGGGTGGGTTTTCTGTAGATGGC  
 ACTGATGTCTAGAAA TTTTGTA **GT**CACAGGATAGGATGCAGGTACTTGTATCCAGGAACAAAGAA TAGGT  
**CAAAGGCAGCAA**ACTGTAGCAACTGTAGAGGGAGGGT TTA CTGATTGAAGAAGAA TAGACTTTCAAATAG  
 TGT TGGTTAGGAAAAGATACAGTTGAGAGAGAGAAAGAGACAGAGAGAGAGAGATTGAAAGAGAGAGACA  
 GGAGAGAGAGAGAGAGAGAGAGAGAGAGAGAGAGAGATTTCAACAGCTCAAGTGCCCTGTTACATAAAGA  
 GCTGGGGCTTTTGTGTTAATTCAACATCAGCTTTTGGGCTTATTTACATAGCAAGGCTCATTTGCATGCT  
 GTCACATATAGTTGTATATACAACTTCATGCATTGAGTATCTCATTTGCATCATAAGACCCACCTCTGT  
 TTTAATATCATAATTAGCCACAGGACACCTTCAGACACC

ChIP-changes: yellow; **CGs**: purple; **guideRNAs**: blue

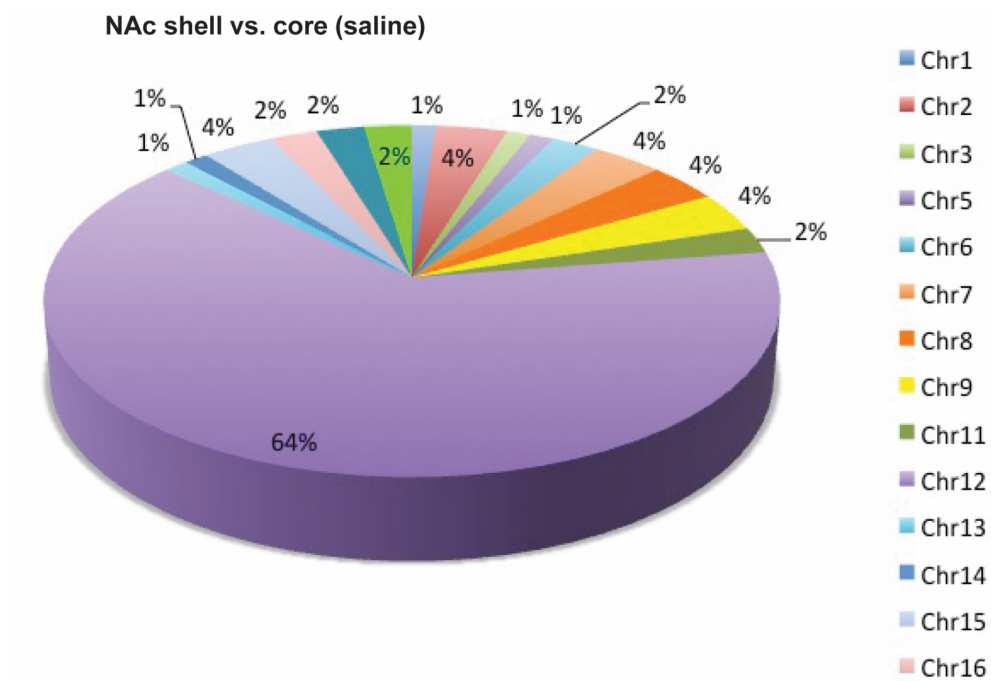

**Figure S2.** *Auts2*-interacting fragments differ substantially in NAc shell versus core. Pie chart of chromosomes with significantly different 4C-fragments in the saline condition. Total changes: 85 of 2159 fragments (3.93%).

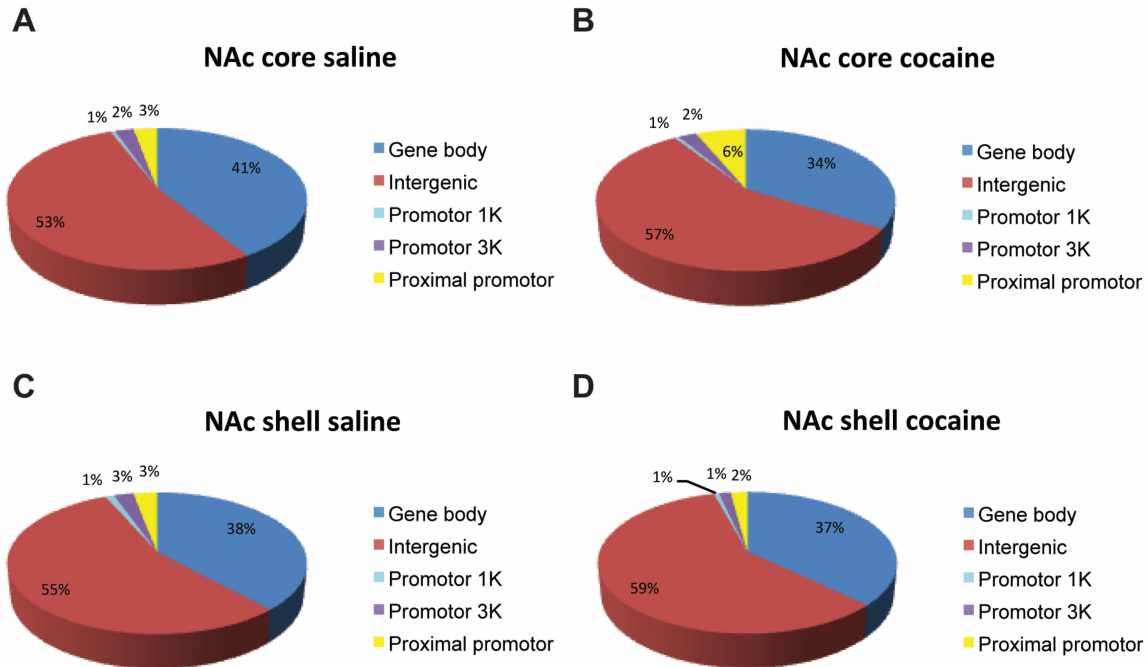

**Figure S3.** Composition of *Auts2*-interacting fragments in individual experimental groups. Pie chart of genomic regions with 4C-fragments that are bound to the *Auts2* bait. (A) NAc core saline. (B) NAc core cocaine. (C) NAc shell saline. (D) NAc shell cocaine. Compositions did not differ significantly between groups.



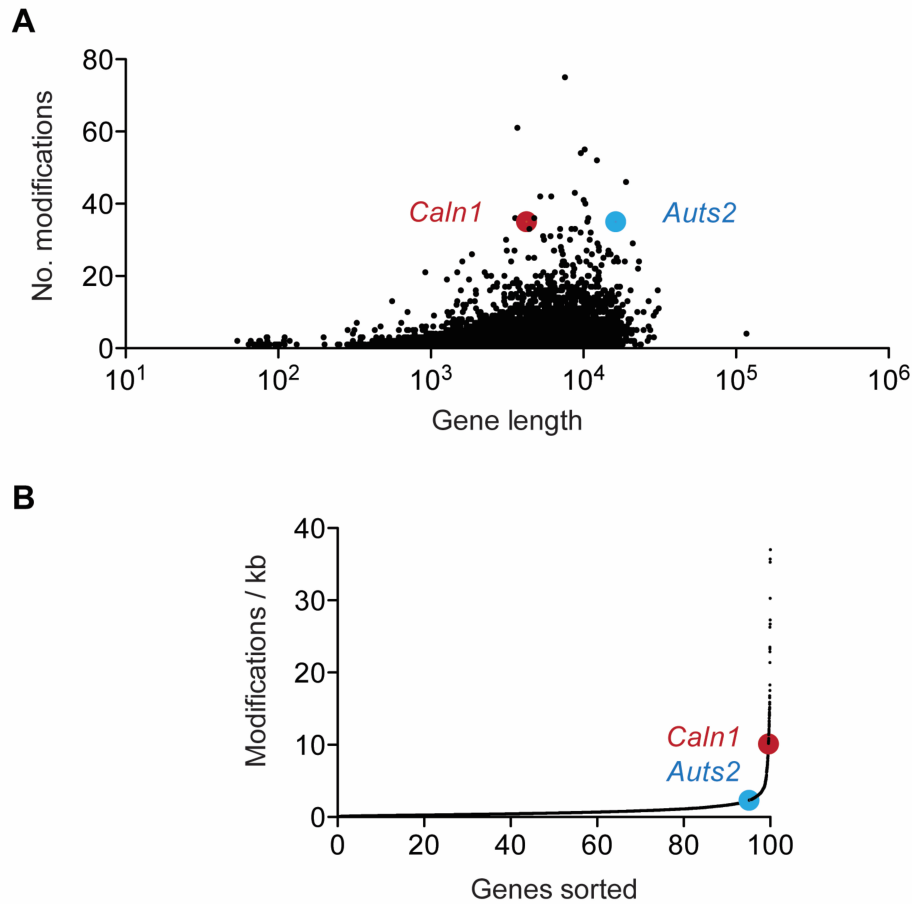

**Figure S4.** Plots of gene length and number of cocaine-induced modifications. (A) Number of modifications versus gene length. (B) Genes were sorted by the number of modifications per kb of length. *Caln1* and *Auts2* have above average numbers of chromatin modifications per kb. Those genes with the highest numbers of modifications per kb consisted in the majority of micro-RNA genes with only one chromatin-modification and may therefore be false positives.

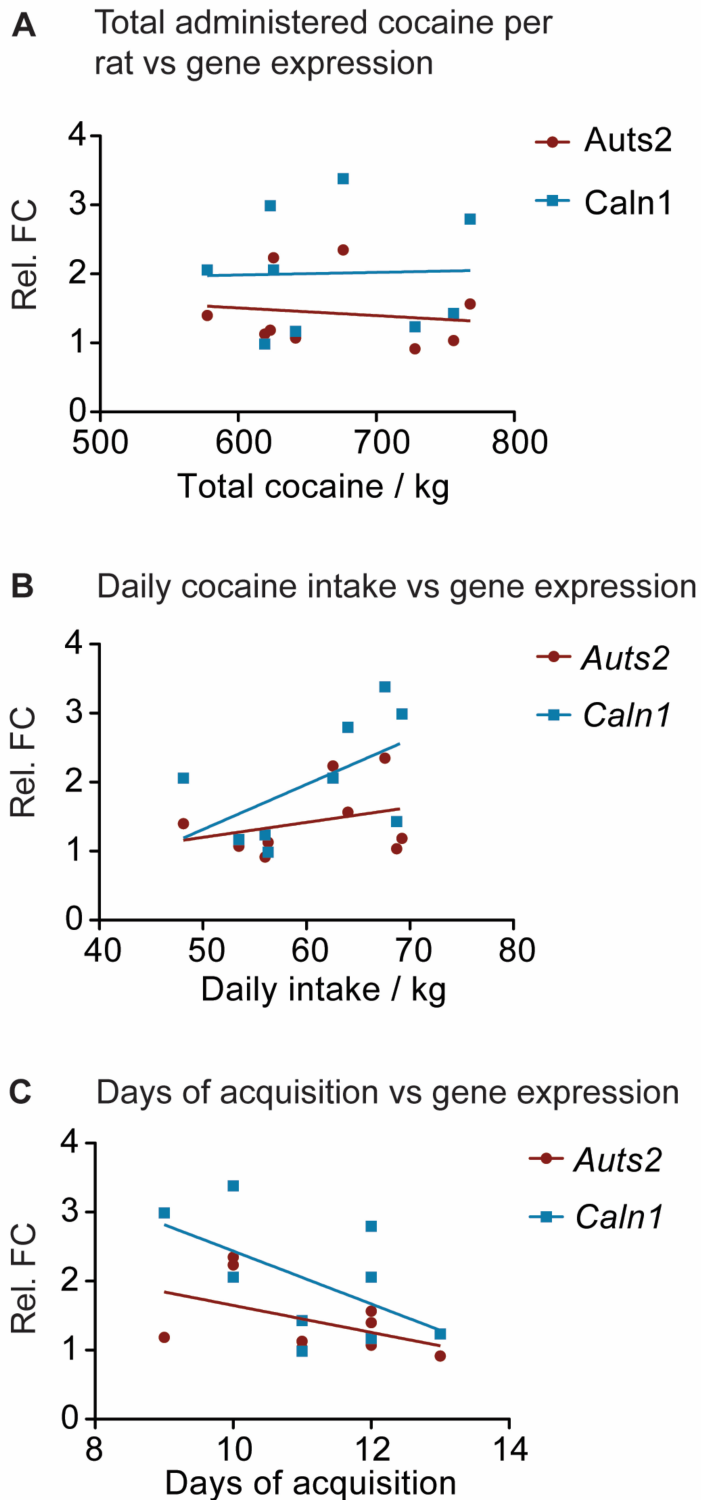

**Figure S5.** Cocaine self-administration in rats. There is no correlation between gene expression of *Auts2* and *Caln1*, and (A) total administered cocaine, (B) daily cocaine intake, or (C) days of acquisition. (A) Linear regression for *Auts2*:  $F(1,7)=0.146$ ,  $P>0.05$ ; *Caln1*:  $F(1,7)=0.006$ ;  $P>0.05$ ;

n=9. (B) Linear regression for Auts2:  $F(1,7)=0.744$ ,  $P>0.05$ ; Caln1:  $F(1,7)=3.184$ ;  $P>0.05$ ; n=9.  
(C) Linear regression for Auts2:  $F(1,7)=2.010$ ,  $P>0.05$ ; Caln1:  $F(1,7)=3.102$ ;  $P>0.05$ ; n=9.

**Figure S6. Potential CTCF-binding sites**

We defined a sequence as a potential CTCF-binding site if at least 10 of 14 nucleotides coincided with the consensus sequence CCGCGNGGNGGCAG determined by Bell and Felsenfeld (15).

*Auts2* forward strand

consensus sequence: CCGCGNGGNGGCAG

**CGGCGGGGGAGGCAA**

**CCGCGCCGGGGATC**

**GCGCGGGGGAGAAA**

underlined: CGs detected by bisulfite sequencing

**pink**: changed CGs (bisulfite sequencing)

CCTGAACCCCTTTCTTTCCACCCATCTGCTGTGGAGGGAGGTGGGGGTGCAGGAAGGGGGCGCAAGGGAAAGGCAAGC  
 TGGACAAGAACGAAACCAGTAGAAGACCAGACCAGGCATACAGCTTAGCGATTCCCTCCTTGCTGCCAATCTGCCCCC  
 AGCTCCCCCTACATAACAACCCACACCAACAATAAGACCTCGGCCGAGACTGAGAGCTTCGAGTG**CGGCGGGGGAGG**  
**CAAGAAAACCGGGGTGCAGCCGAGTGTGGGGGGTGTGCATGCATAAAAGGAAACCATGGGGGGAACAGAAAAGGGGGT**  
 CCCCCTTACCTCCAGCGCTTCAAAGTAACAAAGCTGGTGCATGGCAAATCCATCAATGATGTCCTCTTCGGCTGAGGT  
 GGACTCTCTGCGCTTCTCCGCGGGGGTCTGGGCCGGGACGGGGCGGAGGATGGGGGCTTTCCATTGTCTTCCTTGTC  
 GGAGCCCGACGATGAAGCCAGCGAGGGAGCCCGGGTCCGGCCGGCTCCTATACCACCCCGCCGACCCGGTTCTAACCC  
 GGCCCGGGAGCGTCTCTCCCGGTCTCGCTGTGATCGAGACCTCCGCTTTTTCCGGAGTCCATGTCCC**CGCGT**CGGGCC  
 ATCCATGGTTCTTTTAA**CGCGCCGGGGATC**TTCCCGTTTACCTACCCCGCGCGCCACAGGCTCGGGCCCGCGCCACA  
 CACACACACACACACCCCAAGAAGAAAAAAAAAATTGACACCGAGCCCCCTTCTCCTGCACCGGGCTTTTCCCTCCC  
 GCCCGAGGAAGG**CGCGGGGGAGAAA**GCGGCTGGGAGAAATAAAAAAAAAAAAAAAAAAAAAAAAAAGAATCCGAAGAAGAAC  
 AAGAAGGGAGGGCAGGGGGGAAAAGAGAAAAGAAAAAGGGGAAGGGGCGGGGAGACGGGGAGGGAGGGACGGGGAAG  
 CGAGAGGGCGAAGTGTGGGGCTCCCTCTGCACCGAGGGTCCGAGATGCCTGCGAACAGCGCCGAGCAAAGTAATGGC  
 TGAACACACAGGTCTCCTTTACAGAGGAAAGGGGGAAAAAATAACTCACCAAGCAGGCAATAAATCAGAATAGCGGA  
 ATGCTTTGATCAAGAGACTGGGGAAGCCCTCCCGCGGCCATGCTCTCTCCCACCACTGAAATCGCCTTGCTTCTCC  
 CTTTCTCTAGAGACCCCCAAAAAATTTTAAAAAAAAAAAAAGCCCGAGGTCCGAAAAGGTACCGGTGAAGTGAGGGGT  
 GGGTGGCAATGAACCTTACCCCGCCCCCTCGTGCAGGAAAACACCCACACCTCCGCCTCTCTCACACACTCGCCTCGC  
 AGAAAACTCACTCCCGGGCTCCAGTCTTTTTTTAAGAAATGCATCCAAGGGAAGCCAGGGCTGGAGAGCGAGCTGA

Caln1 reverse strand

As CTCF has a directionality of binding, any potential CTCF-binding site which interacts with the *Auts2* forward strand needs to be localized on the *Caln1* reverse strand.

consensus sequence: CCGCGNGGNGGCAG

**GGGAGATGAGGCAG**

underlined: CGs detected by bisulfite sequencing

GGTGTCTGAAGGTGTCCTGTGGCTAATTATGATATTAACAGAGGTGGGGTCTTATGATGCAAATGAGATACTCAAT  
GCATGAAGTTGTATATACTATATGTGACAGCATGCAAATGAGCCTTGCTATGTAAATAAGCCAAAAGCTGATGT  
TGAATTAACACAAAAGCCCCAGCTCTTTATGTAACAGGGCACTTGAGCTGTTGAAATCTCTCTCTCTCTCTCTC  
TCTCTCTCTCTCCTGTCTCTCTCTTTCAATCTCTCTCTCTGTCTCTTTCTCTCTCTCAACTGTATCTTTTCCTA  
ACCAACTATTTGAAAGTCTATTCTTCTTCAATCAGTAAACCCTCCCTCTACAGTTGCTACAGTTTGCTGCCTTTGA  
CCTATTCTTTGTTTCTGGATAACAAGTACCTGCATCCTATCCTGTGACTACAAAATTTCTAGACATCAGTGCCATCTAC  
AGAAAACCCACCCCAAGATGGGGCAACAACCTCATCAAAGCTGCATGCCTCCTGGAGCCTGCCCCAGACAGCTCCACTG  
AATAACGGTCCCTCCACACAGCCATTATTTACTGTGTCTACAACCCTGGGGTGGGGCCTTGGGAATCTAAAATTTCA  
TTAGCTTCCTGAACCTTGGAGGAGAGCAGGTTGTGGGTATGGGTTGTATGCACATTTTTTTGTATAGGTGTGTGCAG  
CACCGTGTGCTGGTAGACATTTGTTATGAGTGTGTGCAGAAGCCAGAGGTCCAGTCAAGTGTCTCCTTCTATCCCTT  
CCTGCTTTGTTTTTCTGAGACAGGCTCTCCCACTGAACTCAGAGCTTACCAATGCAGCTAAGCTAGCTAAGGAGCCTA  
CTTAGCTCTGCTTCTCCAGCACTAGGACTGCGGGTGTGTACCACAGCCTCTCCCCCTACCCCTGCTTTTTATGTGG  
GTGCTGGGGACCTACACTTAGGATCCCATGCTTGCCTATACGGTAAGGACTTTACTGATTGAGGCATCTCCCAATTT  
TAGCTCCCCTAAATCTTGTGAGCCTCCTGGCTCCCGCCAGTAAAGAATCTTTTCCATTAGAGGAAATAGAACTCAG  
TAGCATGTCCTTAAAAGTTACAGAACAGTCGGGACAAGAGTTCCAGAGACTGAAATAATGTCTGGTTTATGTAGATG  
CCCGAGAATAACATAAGGTGAGATGGACTGCCACCCCAACATCCCCCAGCAACCACCTGGCTGAGCCTCTGGTCCAG  
GTGCATGGGGAGATGAGGCAGGCTAGACAGGCCCTGCCAACAGCAGCCGGAATGTCACAATTGGGCACAGAGTCATCC  
CAACAGTCTGGCACAGGTGAGTGAATGCAGGAAGGCACTGCTGGATGTCTGCTAGTGAGAGGCATGAGCTGATGGGGT  
GTGATGACCGCAGAAGCAAAAATGAGCTTTAGCCCAAGACACGAGTTACCTGAAGGATGTATCGGGAAAGACTGTCC  
CTCACTACCTAATTTACAGAGGCATAGGGACAATGGGGTCCAGAGCAGAATCTGCTGTAGGGGAGGAGGGGCTTTTC  
TTGGTTCTGAATGGAGACT

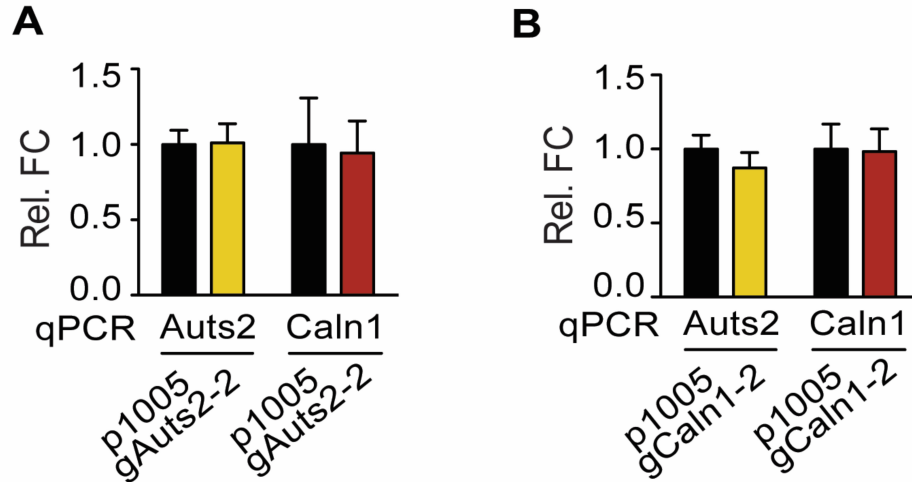

**Figure S7.** Gene expression of *Aut2* and *Caln1* is not affected by a FLAG-tag dCas9 CRISPR construct. (A) Neuro2A cells were co-transfected with the CRISPR-dCas9 and guide-RNA *Aut2.2*, which induced the highest gene expression change in *Caln1* when combined with a Dnmt3A/3L-dCas9. qPCR was conducted for *Aut2* and *Caln1*. No significant changes were detected. Two-way ANOVA: effect of CRISPR:  $F(1,20)=0.013, P>0.05$ . Effect of tested gene:  $F(1,20)=0.027, P>0.05$ . Interaction:  $F(1,20)=0.027, P>0.05, n=6$ . (B) Neuro2A cells were co-transfected with the CRISPR-dCas9 and guide-RNA *Caln1.2*, which induced the highest gene expression change in *Caln1* when combined with a Dnmt3a/3L-dCas9. qPCR was conducted for *Aut2* and *Caln1*. No significant changes were detected. Two-way ANOVA: effect of CRISPR:  $F(1,20)=0.294, P>0.05$ . Effect of tested gene:  $F(1,20)=0.170, P>0.05$ . Interaction:  $F(1,20)=0.170, P>0.05, n=6$ . Graphs show average  $\pm$  SEM.

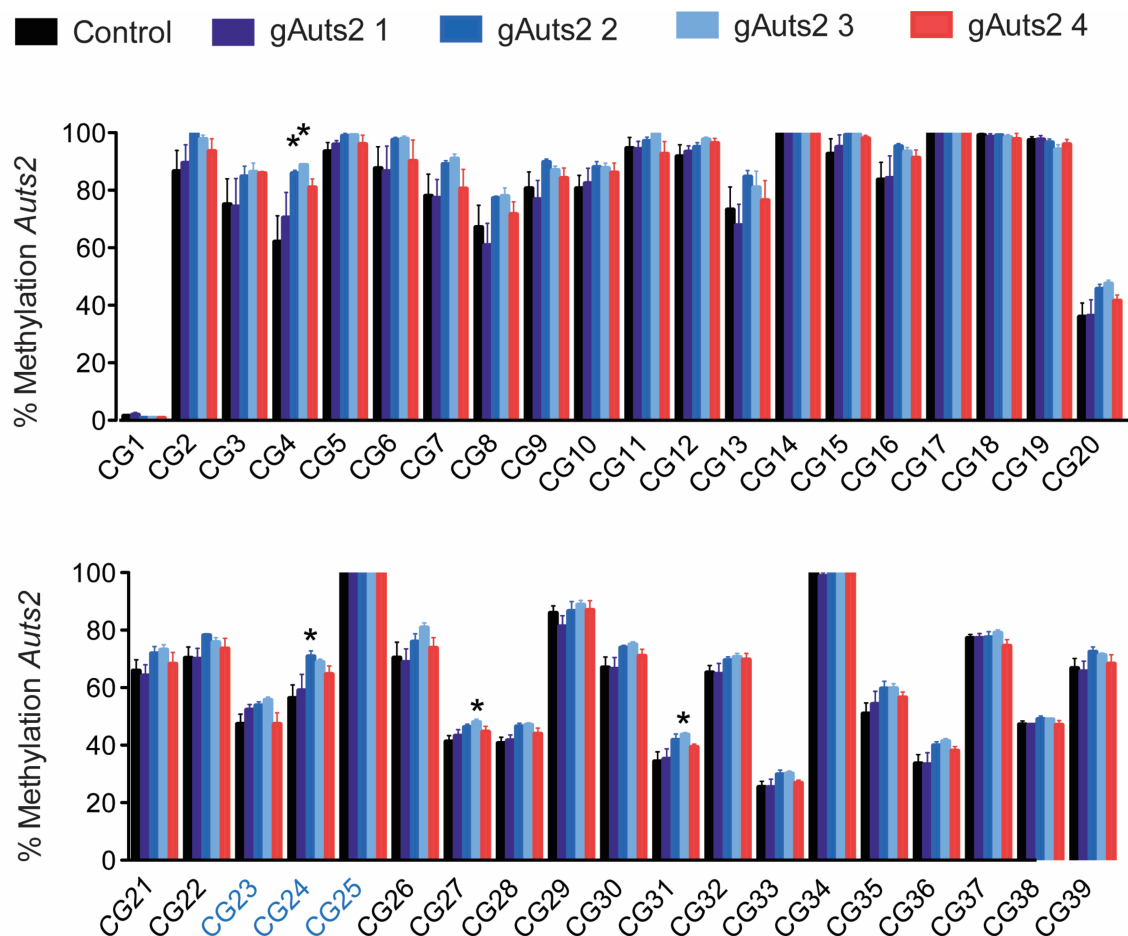

**Figure S8.** CRISPR-dCas9 induced DNA methylation on *Auts2*. Guide-RNAs were designed for *Auts2* and pyrosequencing was conducted on the *Auts2* region, which had been affected by cocaine (blue: putative CTCF binding site). Guide-RNAs induced a general increase in DNA-methylation. Two-way ANOVA: effect of guide-RNAs over all CGs: Ctrl vs. *Auts2* 1:  $F(1,390)=0.011$ ,  $P>0.05$ ; Ctrl vs. *Auts2* 2:  $F(1,351)=52.810$ ,  $P<0.001^{***}$ ; Ctrl vs. *Auts2* 3:  $F(1,390)=70.650$ ,  $P<0.0001^{***}$ ; Ctrl vs. *Auts2* 4:  $F(1,390)=13.35$ ,  $P<0.0001^{***}$ . One-way ANOVA and Dunnett posthoc test: effect of guideRNAs within one CG: CG4: Ctrl vs. *Auts2* 2:  $P<0.05^*$ , Ctrl vs. *Auts2* 3:  $P<0.05^*$ ; CG24: Ctrl vs. *Auts2* 2:  $P<0.05^*$ ; CG27: Ctrl vs. *Auts2* 3:  $P<0.05^*$ ; CG 31: Ctrl vs. *Auts2* 3:  $P<0.05^*$ ,  $n=5-6$ . Graphs show average  $\pm$  SEM.

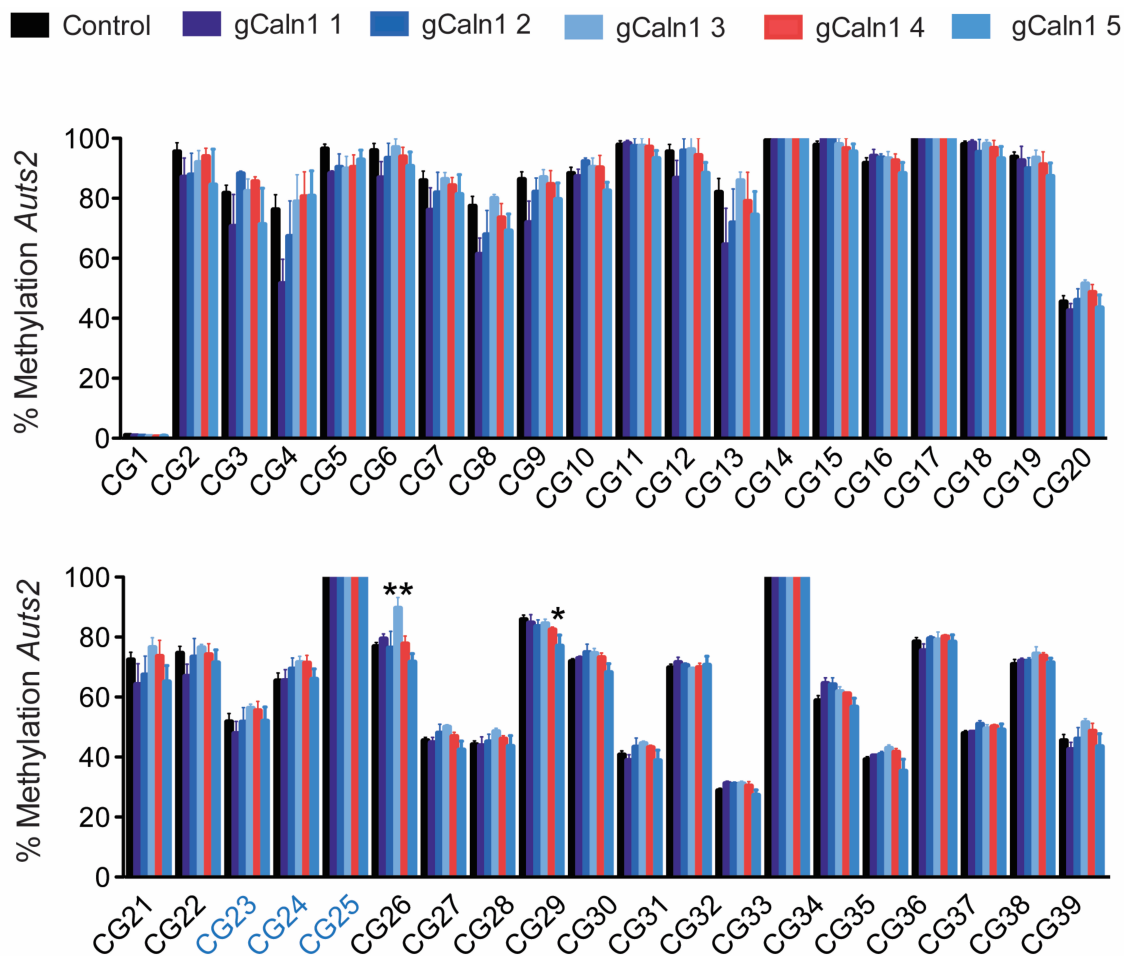

**Figure S9.** CRISPR-dCas9 induced DNA methylation changes on *Auts2*. Guide-RNAs were designed for *Caln1* and pyrosequencing was conducted on the *Auts2* region, which had been affected by cocaine (blue: putative CTCF binding site). Two-way ANOVA: effect of guide-RNAs over all CGs. Ctrl vs. Caln1 1:  $F(1,480)=27.50$ ,  $P<0.0001^{***}$ , interaction between CG and guide-RNA:  $F(1,480)=2.33$ ,  $P<0.0001^{***}$ ; Ctrl vs. Caln1 2:  $F(1,480)=0.8548$ ,  $P>0.05$ ; Ctrl vs. Caln1 3:  $F(1,480)=10.29$ ,  $P<0.01^{**}$ ; Ctrl vs. Caln1 4:  $F(1,480)=0.605$ ,  $P>0.05$ ; Ctrl vs. Caln1 5:  $F(1,480)=21.72$ ,  $P<0.0001^{***}$ . One-way ANOVA and Dunnett posthoc test: effect of guide-RNAs within one CG: CG26: Ctrl vs. Caln1 3:  $P<0.01^{**}$ ; CG29: Ctrl vs. Caln 1 5:  $P<0.05^*$ ; all others: n.s.,  $n=4-10$ . Graphs show average  $\pm$  SEM.



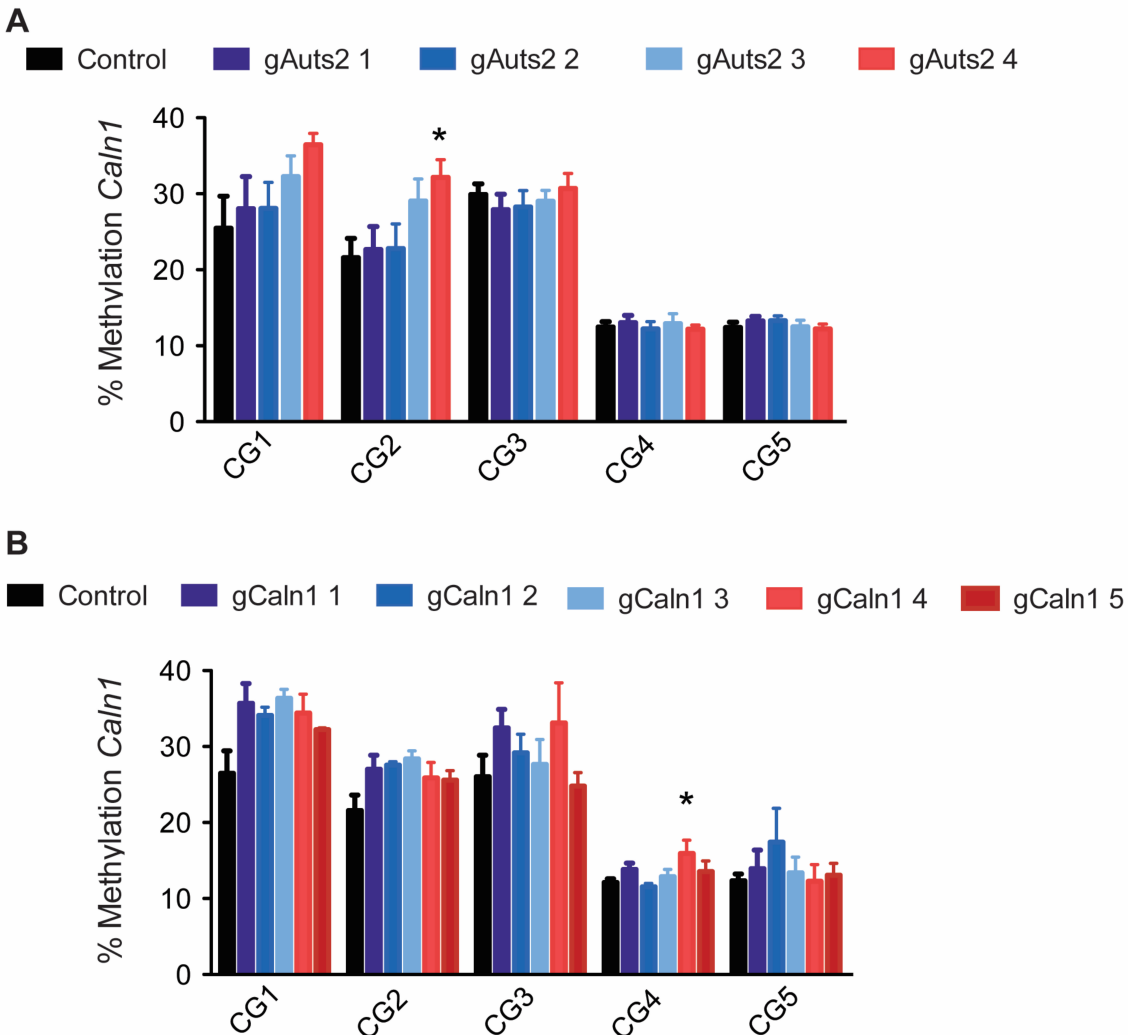

**Figure S10.** CRISPR-dCas9 induced DNA methylation on *Caln1*. Pyrosequencing was conducted on the *Caln1* region, which had been affected by cocaine. (A) Guide-RNAs were designed for *Auts2*. Two-way ANOVA: effect of guide-RNAs over all CGs: Ctrl vs. *Auts2* 1:  $F(1,70)=0.186$ ,  $P>0.05$ ; Ctrl vs. *Auts2* 2:  $F(1,73)=0.153$ ,  $P>0.05$ ; Ctrl vs. *Auts2* 3:  $F(1,73)=4.336$ ,  $P<0.05^*$ ; Ctrl vs. *Auts2* 4:  $F(1,73)=13.08$ ,  $P<0.01^{**}$ , interaction between CG and guideRNA:  $F(1,73)=4.702$ ,  $P<0.05^*$ . One-way ANOVA and Dunnett posthoc test: effect of guideRNAs within one CG: CG2: Ctrl vs. *Auts2* 4:  $P<0.05^*$ ; all others: n.s.,  $n=7-9$ . (B) Guide-RNAs were designed for *Caln1*. Two-way ANOVA: effect of guideRNAs over all CGs: Ctrl vs. *Caln1* 1:  $F(1,193)=2.335$ ,  $P<0.05^*$ ; Ctrl vs. *Caln1* 2:  $F(1,97)=6544$ ,  $P<0.05^*$ ; Ctrl vs. *Caln1* 3:  $F(1,99)=10.450$ ,  $P<0.01^{**}$ ; Ctrl vs. *Caln1* 4:  $F(1,94)=6.042$ ,  $P<0.05^*$ ; Ctrl vs. *Caln1* 5:  $F(1,92)=1.718$ ,  $P>0.05$ . One-way ANOVA and Dunnett posthoc test: effect of guideRNAs within one CG CG4: Ctrl vs. *Caln1* 4:  $P<0.05^*$ ; all others: n.s.,  $n=3-19$ . Graphs show average  $\pm$  SEM.

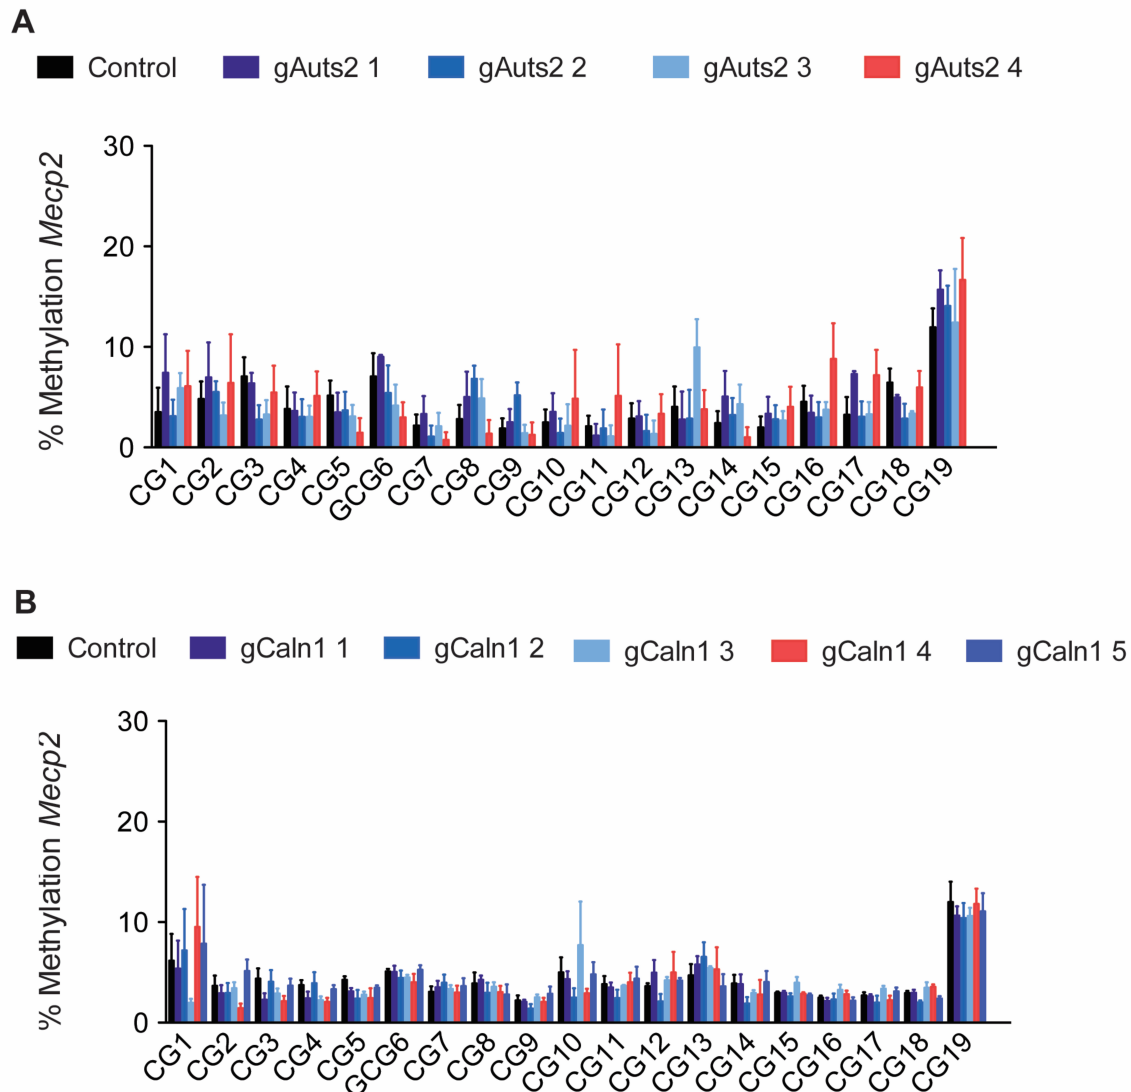

**Figure S11.** CRISPR-dCas9 did not induce DNA methylation on *Mecip2*. (A) Guide-RNAs were designed for *Auts2*. Two-way ANOVA: effect of guide-RNAs over all CGs: Ctrl vs. *Auts2* 1:  $P > 0.05$ ;  $F(1,76) = 2.400$ ; Ctrl vs. *Auts2* 2:  $F(1,76) = 1.363$ ,  $P > 0.05$ ; Ctrl vs. *Auts2* 3:  $F(1,94) = 0.1908$ ,  $P > 0.05$ ; Ctrl vs. *Auts2* 4:  $F(1,76) = 0.600$ ,  $P > 0.05$ ,  $n = 3-4$ . (B) Guide-RNAs were designed for *Caln1*. Two-way ANOVA: effect of guide-RNAs over all CGs: Ctrl vs. *Caln1* 1:  $F(1,171) = 0.928$ ,  $P > 0.05$ ; Ctrl vs. *Caln1* 2:  $F(1,152) = 3.020$ ,  $P > 0.05$ ; Ctrl vs. *Caln1* 3:  $F(1,155) = 0.516$ ,  $P > 0.05$ ; Ctrl vs. *Caln1* 4:  $F(1,190) = 0.900$ ,  $P > 0.05$ ; Ctrl vs. *Caln1* 5:  $F(1,152) < 0.001$ ,  $P > 0.05$ ,  $n = 4-6$ . Graphs show average  $\pm$  SEM.

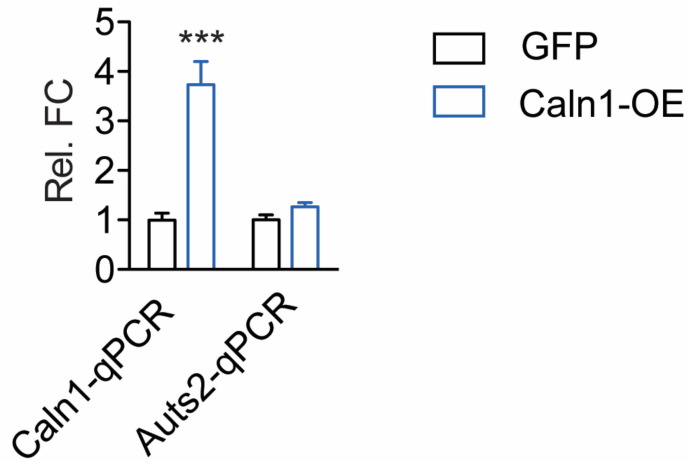

**Figure S12.** The HSV overexpressing *Caln1* increased mRNA levels of *Caln1* but not *Auts2*. *Caln1*-HSV and GFP control were stereotaxically injected into mouse NAc and animals were analyzed 4 days later. mRNA levels were assessed by qPCR. Two-way ANOVA: effect of HSV:  $F(1,46)=28.180$ ,  $P<0.001^{***}$ ; Effect of tested gene:  $F(1,46)=19.090$ ,  $P<0.001^{***}$ ; Interaction:  $F(1,46)=19.090$ ,  $P<0.001^{***}$ ,  $n=11-14$ . Bonferroni posthoc test: effect of HSV within *Caln1*-qPCR:  $P<0.001^{***}$ ; effect of HSV within *Auts2*-qPCR:  $P>0.05$ . Graphs show average  $\pm$  SEM.

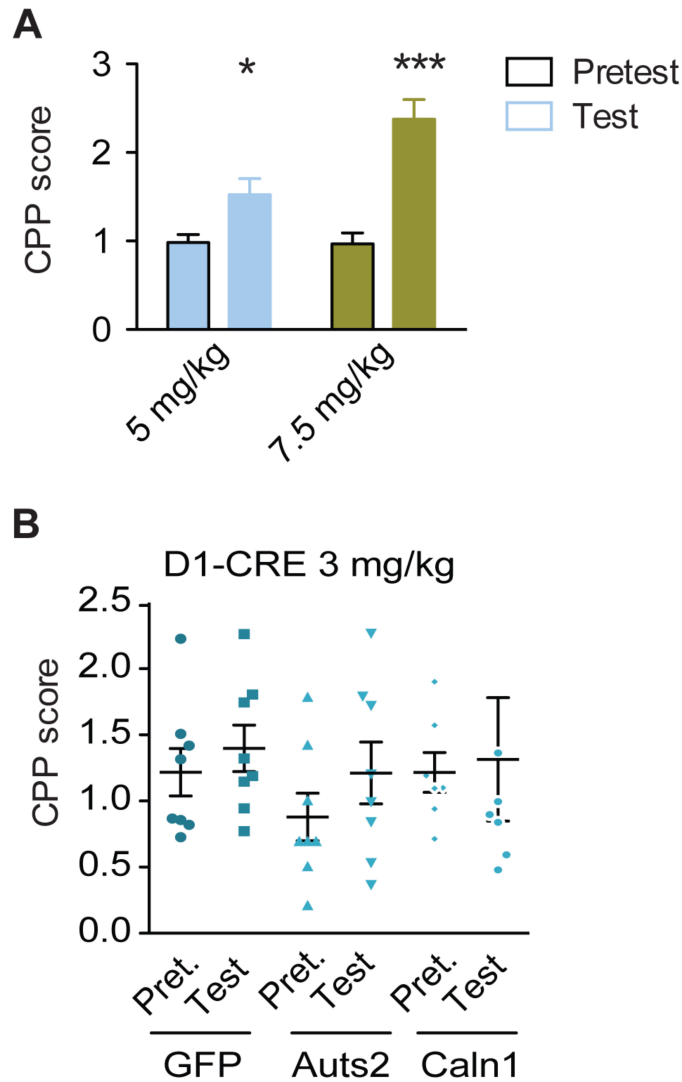

**Figure S13.** Optimization of conditioned cocaine place preference (CPP) in wild-type C57Bl/6J mice. (A) CPP was performed with 5 mg/kg and 7.5 mg/kg cocaine. 5 mg/kg induced CPP without having reached a ceiling effect and was therefore selected as the experimental dose in Fig 5. Two-way ANOVA: effect of dose:  $F(1,36)=6.616$ ,  $P<0.05^*$ ; Effect of cocaine:  $F(1,36)=36.180$ ,  $P<0.0001^{***}$ ; Interaction:  $F(1,36)=67.150$ ,  $P<0.05^*$ ,  $n=10$  (B) D1-Cre mice did not show an Auts2- or Caln1-induced difference in CPP Score at a lower 3 mg/kg dose. One-way ANOVA:  $F(5,40)=0.534$ ,  $P>0.05$ ,  $n=9-11$ . Graphs show average +/- SEM.

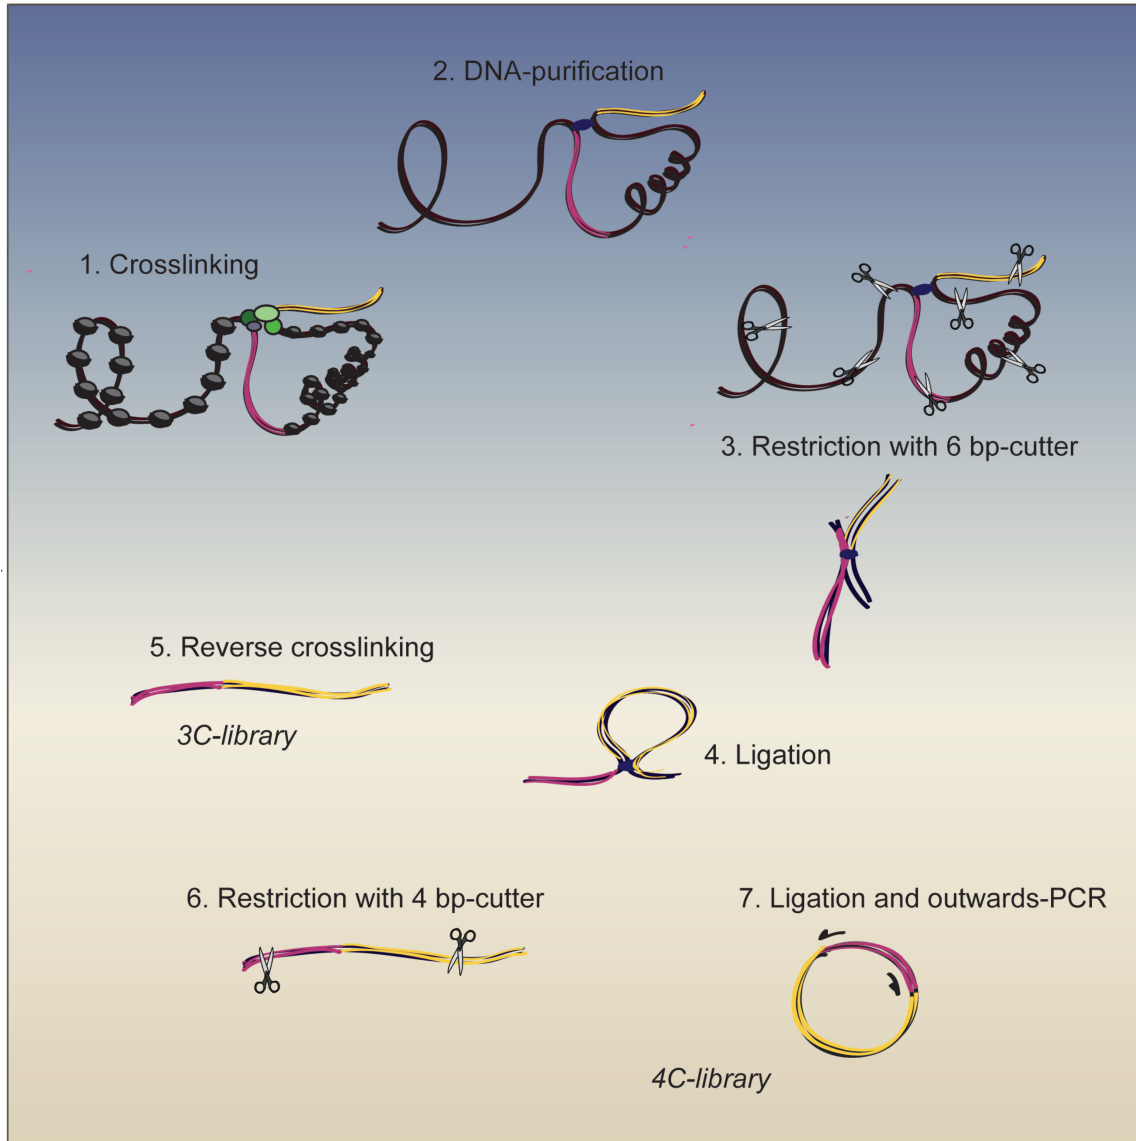

**Figure S14.** Generation of 3C- and 4C-libraries.

## Supplemental References

1. Mitchell AC, Bharadwaj R, Whittle C, Krueger W, Mirnics K, Hurd Y, *et al.* (2014): The genome in three dimensions: A new frontier in human brain research. *Biol Psychiatry*. 75.
2. Andrews S (2010): FastQC: a quality control tool for high throughput sequence data. .
3. Martin M (2011): Cutadapt removes adapter sequences from high-throughput sequencing reads. *EMBnet.journal*. 17: 10.
4. Langmead B, Trapnell C, Pop M, Salzberg SL (2009): Ultrafast and memory-efficient alignment of short DNA sequences to the human genome. *Genome Biol*. 1–10.
5. Klein FA, Pakozdi T, Anders S, Ghavi-Helm Y, Furlong EEM, Huber W (2015): FourCSeq: Analysis of 4C sequencing data. *Bioinformatics*. 31: 3085–3091.
6. Love MI, Huber W, Anders S (2014): Moderated estimation of fold change and dispersion for RNA-seq data with DESeq2. *Genome Biol*. 15: 550.
7. Calipari ES, Ferris MJ, Siciliano CA, Zimmer BA, Jones SR (2014): Intermittent cocaine self-administration produces sensitization of stimulant effects at the dopamine transporter. *J Pharmacol Exp Ther*. 349: 192–8.
8. Calipari ES, Ferris MJ, Siciliano CA, Jones SR (2015): Differential influence of dopamine transport rate on the potencies of cocaine, amphetamine, and methylphenidate. *ACS Chem Neurosci*. 6: 155–162.
9. Hodes GE, Pfau ML, Purushothaman I, Ahn HF, Golden SA, Christoffel DJ, *et al.* (2015): Sex Differences in Nucleus Accumbens Transcriptome Profiles Associated with Susceptibility versus Resilience to Subchronic Variable Stress. *J Neurosci*. 35: 16362–76.
10. Wook Koo J, Labonté B, Engmann O, Calipari ES, Juarez B, Lorsch Z, *et al.* (2015): Essential Role of Mesolimbic Brain-Derived Neurotrophic Factor in Chronic Social Stress-Induced Depressive Behaviors. *Biol Psychiatry*. . doi: 10.1016/j.biopsych.2015.12.009.
11. Siddique AN, Nunna S, Rajavelu A, Zhang Y, Jurkowska RZ, Reinhardt R, *et al.* (2013): Targeted methylation and gene silencing of VEGF-A in human cells by using a designed Dnmt3a-Dnmt3L single-chain fusion protein with increased DNA methylation activity. *J Mol Biol*. 425: 479–491.
12. Chen S, Sanjana NE, Zhang F, Sharp P a, Chen S, Sanjana NE, *et al.* (2015): Genome-wide CRISPR Screen in a Mouse Model of Tumor Growth and Metastasis Resource Genome-wide CRISPR Screen in a Mouse Model of Tumor Growth and Metastasis. *Cell*. 160: 1–15.
13. Engmann O, Giralt A, Gervasi N, Marion-Poll L, Gasmi L, Filhol O, *et al.* (2015): DARPP-32 interaction with adducin may mediate rapid environmental effects on striatal neurons. *Nat Commun*. 6: 10099.
14. Feng J, Shao N, Szulwach KE, Vialou V, Huynh J, Zhong C, *et al.* (2015): Role of Tet1 and 5-hydroxymethylcytosine in cocaine action. *Nat Neurosci*. 18: 536–544.
15. Bell AC, Felsenfeld G (2000): Methylation of a CTCF-dependent boundary controls imprinted expression of the Igf2 gene. *Nature*. 405: 482–485.
